# Supplementary material for: Cervical cancer survivors’ perceived cognitive complaints and supportive care needs in mainland China: a qualitative study
Source: PubMed Central journal article supplement — BMJ Open. 2017 Jun 22;7(6):e014078. doi: 10.1136/bmjopen-2016-014078 (PMC5577865; doi:10.1136/bmjopen-2016-014078), 2017-06-22
Supplement: bmjopen-2016-014078.draft_revisions.pdf [file bmjopen-2016-014078.draft_revisions.pdf]

# BMJ Open

## Cognitive complaints and supportive care needs in Chinese cervical cancer survivors: a qualitative study

|                                 |                                                                                                                                                                                                                                                                                                                                                                                                                        |
|---------------------------------|------------------------------------------------------------------------------------------------------------------------------------------------------------------------------------------------------------------------------------------------------------------------------------------------------------------------------------------------------------------------------------------------------------------------|
| Journal:                        | <i>BMJ Open</i>                                                                                                                                                                                                                                                                                                                                                                                                        |
| Manuscript ID                   | bmjopen-2016-014078                                                                                                                                                                                                                                                                                                                                                                                                    |
| Article Type:                   | Research                                                                                                                                                                                                                                                                                                                                                                                                               |
| Date Submitted by the Author:   | 30-Aug-2016                                                                                                                                                                                                                                                                                                                                                                                                            |
| Complete List of Authors:       | Zeng, Y; The Hong Kong Polytechnic University, Department of Rehabilitatoin Sciences; The Third Affiliated Hospital of Guangzhou Medical University, Research Institute of Gynecology and Obstetrics<br>Cheng, Andy; The Hong Kong Polytechnic University<br>Liu, Xiangyu; Hunan Cancer Hospital, Department of Nursing<br>Chan, Chetwyn ; The Hong Kong Polytechnic University, Department of Rehabilitatoin Sciences |
| <b>Primary Subject Heading</b>: | Qualitative research                                                                                                                                                                                                                                                                                                                                                                                                   |
| Secondary Subject Heading:      | Oncology, Qualitative research                                                                                                                                                                                                                                                                                                                                                                                         |
| Keywords:                       | Cervical cancer, Survivors, Cognitive complaints, Supportive care needs                                                                                                                                                                                                                                                                                                                                                |
|                                 |                                                                                                                                                                                                                                                                                                                                                                                                                        |

SCHOLARONE™  
Manuscripts

1  
2  
3 **Title: Cognitive complaints and supportive care needs in Chinese cervical cancer survivors:**  
4  
5 **a qualitative study**  
6  
7  
8  
9

10 Yingchun Zeng<sup>1,2</sup>, MPhil, PhD Candidate; Andy SK Cheng<sup>1</sup>, PhD; Xiangyu Liu<sup>3</sup>, Chetwyn  
11  
12 CH Chan<sup>1</sup>, PhD  
13  
14

15  
16  
17 **Author Affiliations:**  
18

19  
20 <sup>1</sup>Department of Rehabilitation Sciences, The Hong Kong Polytechnic University, Hong Kong,  
21  
22 China  
23

24 <sup>2</sup>Research Institute of Gynecology and Obstetrics, The Third Affiliated Hospital of  
25  
26 Guangzhou Medical University, Guangzhou, China  
27

28  
29 <sup>3</sup>Department of Nursing, Hunan Cancer Hospital, Changsha, China  
30  
31  
32  
33  
34  
35

36 **Correspondence:** Dr Andy Cheng, Department of Rehabilitatoin Sciences, The Hong Kong  
37  
38 Polytechnic University, Hung Hom, Hong Kong, China (Email:  
39  
40 andy.sk.cheng@polyu.edu.hk).  
41  
42  
43  
44  
45  
46  
47  
48  
49  
50  
51  
52  
53  
54  
55  
56  
57  
58  
59  
60

## Abstract

**Objectives:** This study aims to explore perceived cognitive complaints and relevant supportive care needs in Chinese cervical cancer survivors after primary cancer treatment.

**Design:** This study utilized a qualitative research design. A semi-structured interview was used to probe cervical cancer patients' perceived cognitive complaints and supportive care needs.

**Setting:** This study was conducted in a secondary cancer care center, located in South China. China.

**Participants:** 31 women with cervical cancer after primary cancer treatment, aged 18-60 years old, were purposively selected using non-random sampling procedures.

**Results:** A total of 31 cervical cancer survivors joined this study. Of that total, 20 women (64.5%) reported cognitive complaints after cancer treatment. The most common complaint was loss of concentration (n=17, 54.8%). Perceived contributing factors to these cognitive complaints included chemotherapy (n=15, 48.4%), and aging (n=8, 25.8%). These cognitive problems most commonly impacted their daily living (n=20, 64.5%). Common supportive care needs include symptom management strategies (n=11, 35.5%), and counseling services (n=8, 25.8%).

**Conclusion:** This study adds new insights into the growing body of research on cognitive complaints by cancer survivors, in particular Chinese cervical cancer survivors. Improved understanding of cognitive complaints would subsequently facilitate the development of relevant therapeutic interventions for preventing, and providing supportive care services, such as educational and counseling services, to reduce cognitive impairment in women with cervical cancer.

### Strengths and limitations of this study

- This is one of the first published studies exploring cognitive complaints in Chinese cervical cancer survivors, which is an understudied population.
- 'Doing nothing' as a common coping strategy for cognitive complaints, which has cultural implications in a Chinese population.
- This study, as a pilot, only recruited study participants at a single medical center, which could limited the transferability of study findings.

**Keywords** Cervical cancer. Survivors. Cognitive complaints. Supportive care needs.

## Introduction

Cervical cancer is the second most common cancer, followed by breast cancer, among women in China.<sup>1</sup> Due to medical advancements in early detection and the possibility of curative cancer treatment,<sup>2</sup> the five-year relative survival rate of cervical cancer in mainland China is up to 69% for all stages.<sup>1</sup> As more cervical cancer survivors are living longer after curative treatment, late effects of cancer treatment are becoming increasingly common.<sup>3</sup> One such long-term and late effect is neurocognitive, which has emerged as a significant problem affecting cervical cancer survivors.<sup>4,5</sup>

Cognitive complaints often refer to cognitive impairment or cancer-related cognitive impairment.<sup>6,7</sup> Other studies have described this as chemotherapy-related cognitive dysfunction, colloquially named ‘chemo brain’ or ‘chemo fog’.<sup>8,9</sup> Cognitive complaints have the potential to significantly impact both social and occupational functioning, interfering with the ability to carry out normal daily activities, all of which in turn contributes to lower quality of life (QOL) in cancer survivors.<sup>4,6,10</sup> Cognitive complaints have been reported in approximately 40% of patients prior to any cancer treatment, and as many as 75% of patients indicate some degree of cognitive impairment during the period of active cancer treatment. Finally, cognitive complaints are still present in up to 60% of long-term cancer survivors.<sup>6</sup> In a study conducted in mainland China, female cancer survivors with an average of 2.79 years post primary treatment reported higher levels of cognitive limitations, significantly reducing their work productivity and global QOL.<sup>7</sup>

There are quantitative research approaches employed to explore cognitive complaints and related supportive care issues among cancer survivors,<sup>4,12</sup> and these researchers have proposed that quantitative cognitive measures are more objective and reliable than qualitative exploration of

1  
2  
3 cognitive problems in cancer survivors.<sup>13,14</sup> However, other researchers argued that there are  
4 inherent difficulties with a quantitative approach, in terms of fully appreciating cognitive  
5 complaints by cancer patients.<sup>4,15</sup> Qualitative research studies would enable us to identify the  
6 presence of cognitive symptoms that quantitative approaches cannot detect, either by self-  
7 reported cognitive measures or neurocognitive tests.<sup>15</sup> In addition, qualitative in-depth interviews  
8 could provide information about how cognitive impairment impacts cancer patients' QOL, and  
9 could allow researchers to obtain rich information about numerous coping strategies to  
10 ameliorate cognitive dysfunction symptoms, as well as develop intervention strategies.<sup>15</sup>  
11  
12

13  
14  
15 Therefore, there is a need for a qualitative study to explore perceived cognitive complaints and  
16 relevant supportive care needs in cervical cancer survivors after primary cancer treatment. A  
17 clear understanding of cognitive complaints experienced by cervical cancer survivors, through  
18 qualitative in-depth interviews, could aid health care providers in developing targeted  
19 interventions, as well as in providing relevant supportive care services for alleviating the extent  
20 and impact of cognitive complaints in cancer survivors.<sup>16</sup>  
21  
22  
23  
24  
25  
26  
27  
28  
29  
30  
31  
32  
33  
34  
35  
36  
37  
38  
39  
40

## 41 **Methods**

### 42 *Design*

43  
44  
45 This study utilized a qualitative research design. A semi-structured interview was used to probe  
46 cervical cancer patients' perceived cognitive complaints and supportive care needs.  
47  
48  
49  
50  
51  
52  
53  
54  
55  
56  
57  
58  
59  
60

### *Study sample*

All study participants were recruited from the Gynecological Oncology Unit in a cancer hospital. This study obtained ethical approval from the hospital's ethics committee. Inclusion criteria were: women who were at least 18 years old, with a primary diagnosis of cervical cancer, who had completed their primary cancer treatment of surgery, radiation therapy or chemotherapy. Exclusion criteria included potential psychiatric disorders, previous cancer history, or traumatic brain injury.

### *Study procedure and qualitative interviews*

After obtained written consents, eligible participants were invited to participate in a semi-structured interview, and complete a socio-demographic sheet. This sheet was used to collect information on demographic and clinical characteristics, including age, education level, marital status, stage of tumor, type of cancer treatment received, and time since completion of primary cancer treatment.

The interviews were conducted face-to-face at the in-patient ward's meeting room. All interviews utilized an interview guide composed of the following open-ended questions: 1) Compared to before your cancer diagnosis, tell us about the overall change in your cognitive abilities? For example, perceptions of understanding what people say to you, thinking of the right word when responding to others, feeling confident in completing a task or taking on new tasks? 2) What do you think the common contributing factors to any cognitive changes might be? 3) How about these perceived cognitive changes impact your daily life or work ability? 4) How do you deal with these changes, in other words, what types of coping strategies do you use as a result of any cognitive change you might be experiencing? 5) What types of supportive care services you

1  
2  
3 would like to seek from health care providers to help you cope with cognitive complaints? Each  
4  
5 interview lasted 30 to 45 minutes, and was recorded by a digital recorder and transcribed  
6  
7  
8 verbatim.  
9

### 10 11 *Data analysis*

12  
13  
14 Qualitative interview data were transcribed for producing a verbatim transcript. Qualitative  
15  
16 content analysis was used to identify and organize these verbatim data into clusters and  
17  
18 categories.<sup>17</sup> Two researcher members independently conducted content analysis. For any  
19  
20 disagreement with interpretation of clusters or categories, a third research member was involved  
21  
22 in the discussion process for establishing consensus.  
23  
24  
25  
26  
27  
28  
29

### 30 31 **Results**

32  
33 A total of 31 women with cervical cancer who had completed primary cancer treatment joined  
34  
35 this study. Socio-demographic and clinical characteristics are listed in Table 1. The mean age  
36  
37 was 45.06 (9.61), ranging from 19 to 57 years old. More than half of the participants had lower  
38  
39 education levels (n=17, 54.8). All of these women were currently unemployed or on medical  
40  
41 leave, as the mean duration of time since completion of primary cancer treatment was 1.22 (1.08)  
42  
43 months. Almost all of the participants were married (n=29, 93.5%). Nearly half were at an early  
44  
45 disease stage (n=14, 45.2%). Over 90% of the women had had surgery (n=28, 90.3%), more than  
46  
47 half had had chemotherapy (n=17, 54.8%), and 12 women had undergone radiation therapy  
48  
49 (38.7%).  
50  
51  
52  
53  
54  
55  
56  
57  
58  
59  
60



1  
2  
3 Among the 31 cervical cancer survivors, 20 (64.5%) reported cognitive complaints after cancer  
4 treatment. Eleven women identified no cognitive changes, compared with pre-cancer diagnosis.  
5  
6 Major categories emerged from the data including cognitive complaints, perceived contributing  
7 factors, impacts of cognitive problems on women's daily lives, health outcomes and work  
8 capabilities, coping strategies and supportive care needs from health care providers are shown in  
9 Table 2. The most common complaint was loss of concentration (n=17, 54.8%), followed by  
10 memory problems (n=15, 48.4%). Other common cognitive complaints included difficulties in  
11 learning new things, language issues (finding the right word to respond in everyday  
12 conversations), and a slowed rate of information processing.  
13  
14

15  
16  
17 The participants identified several factors that they believed were contributing to their cognitive  
18 complaints including chemotherapy (n=15, 48.4%), side effects of cancer and other treatment  
19 such as surgery or radiation therapy (n=12, 38.7%), and aging (n=8, 25.8%). These cognitive  
20 complaints had negative impacts on their daily lives, sleep and rest (n=20, 64.5%). Two  
21 participants indicated their cognitive function had seen negligible change, but their physical  
22 health had deteriorated significantly after cervical cancer diagnosis. While those women who  
23 were on medical leave at the time of data collection, two women indicated they were planning to  
24 leave their jobs due to loss of concentration and slowed information processing capacity.  
25  
26

27  
28  
29 As shown in Table 2, the most commonly used coping strategies were memo writing (n=15,  
30 48.4%), and self-adjustment (n=14, 45.2%). Other coping strategies include "doing nothing" and  
31 organization of their environment. In addition, one woman sought acupuncture as an alternative  
32 therapy for her cognitive problems, as she had been told by her physician that there was no  
33 effective medication for cognitive impairment thus far. Chinese cervical cancer survivors  
34 describe a variety of supportive care needs, such as the need for education on common signs and  
35  
36  
37  
38  
39  
40  
41  
42  
43  
44  
45  
46  
47  
48  
49  
50  
51  
52  
53  
54  
55  
56  
57  
58  
59  
60

1  
2  
3 symptoms of cognitive impairment and effective treatment therapies (n=11, 35.5%), providing  
4 counseling service to family members (n=8, 25.8%), and information on further rehabilitation  
5 services (n=7, 22.6%). Two women expressed the need for peer support, and suggested that  
6 health care providers could organize a peer support service for patients starting from the  
7 diagnosis stage onward. Several patients indicated that their health care providers had never  
8 mentioned cognitive impairment issues, and only mentioned this when patients asked about  
9 cognitive problems that appeared during cancer treatment.  
10  
11

12  
13  
14  
15 By a synthesis of these qualitative findings, a preliminary cognition model among cervical  
16 cancer survivors after cancer treatment is illustrated in Figure 1. Cognitive complaints are  
17 multifactorial in nature, and contributing factors include demographic characteristics, biological  
18 factors, psychological distress, disease stage and cancer therapies.  
19  
20  
21  
22  
23  
24  
25  
26  
27  
28  
29  
30  
31  
32  
33

## 34 Discussion

35  
36  
37 This is one of the first published studies exploring cognitive complaints in Chinese cervical  
38 cancer survivors, while there is accumulating evidence documenting cognitive impairment issues  
39 among cancer survivors, mainly dominated by breast cancer survivors.<sup>18</sup> The prevalence of  
40 cognitive complaints among Chinese cervical cancer survivors was 64.5%, which is consistent  
41 with previous research.<sup>6</sup> Yet since this study, as a pilot, adopted a small and non-random sample,  
42 epidemiological studies are needed to further quantify the prevalence, impact and extent of  
43 cognitive complaints in this study population.<sup>19</sup>  
44  
45  
46  
47  
48  
49  
50  
51  
52  
53  
54

55 Concurring with previous research evidence, chemotherapy and the side effects of cancer are the  
56 most common factors associated with cognitive complaints.<sup>4,7</sup> This study identified that cervical  
57  
58  
59  
60

1  
2  
3 cancer survivors perceive that aging is a likely contributing factor in cognitive impairment.  
4  
5 These participants took “aging as a normal process of cognitive decline,” and viewed cognitive  
6  
7 impairment as a process that could not be changed. In their coping strategies, this is the reason  
8  
9 that some women did nothing to try to cope with their cognitive complaints. ‘Doing nothing’ as a  
10  
11 common coping strategy for cognitive complaints could be related to the Chinese Taoist  
12  
13 philosophy: “Accepting the fact that a situation cannot be changed, and telling oneself that one  
14  
15 should do little, as things will be all right at the end of the day”.<sup>20</sup> Hence, coping strategies of  
16  
17 doing nothing and self-adjustment could help these survivors maintain a sense of calm when  
18  
19 facing difficulties cannot be changed.  
20  
21  
22  
23

24  
25 As in previous studies,<sup>4,6,7</sup> findings from this study also revealed that cognitive complaints had a  
26  
27 variety of consequences that impacted daily living, QOL, physical and psychological health, and  
28  
29 work capabilities. While research into the relationship between cognitive functioning and work  
30  
31 ability is still in its infancy,<sup>21</sup> returning to work is a critical milestone for many survivors, since  
32  
33 work plays a key role in one’s psychological, economic, and social wellbeing.<sup>22</sup> If cancer  
34  
35 survivors were able to obtain individualized support and work-related adjustments from their  
36  
37 employers, they would be more likely to continue working.<sup>23</sup> Hence, cognitive complaints in  
38  
39 cancer survivors generate numerous supportive care requirements, not just in the workplace, but  
40  
41 also from health care providers.  
42  
43  
44  
45  
46

47  
48 Common supportive care needs from health care providers include providing information about  
49  
50 common signs of cognitive symptoms and management strategies, effective treatment therapies  
51  
52 and possible rehabilitation services, in order to manage cognitive problems. Although many  
53  
54 health care providers may gloss over the issue of patient cognitive complaints, believing they  
55  
56 have no curative treatment to offer patients,<sup>22</sup> findings from a meta-analysis indicate that  
57  
58  
59  
60

1  
2  
3 neuropsychological interventions (cognitive rehabilitation, cognitive training and  
4 neuromodulation strategies) can improve cognitive function in cancer survivors.<sup>24</sup> Additionally,  
5 behavioral intervention strategies (increasing physical activities and fostering supportive social  
6 relationships) could be helpful in improving cognitive function among cancer survivors.<sup>12</sup>  
7  
8  
9  
10  
11

12  
13  
14 By a synthesis of these study findings, a preliminary cognition model for cervical cancer  
15 survivors after cancer treatment was established, to provide a theoretical underpinning for the  
16 perception of cognitive complaints, contributing factors, mediating factors, and the consequences  
17 of cognitive impairment in this study population. This model may be able to inform and  
18 stimulate further intervention studies. Certainly, this preliminary cognition model of cervical  
19 cancer survivors after cancer treatment can be continuously refined by further empirical research  
20 investigations. Overall, this model illustrates coping strategies at a personal level by self-  
21 adjustment or by doing nothing; and supportive care services, such as educational and counseling  
22 services for family members by health care providers could mediate the extent of the  
23 consequences of cognitive impairment. In addition, participants felt a great need for support,  
24 such as peer support, from diagnosis onwards, as well as for information on available  
25 rehabilitation services and counseling, to modulate the degree of cognitive complaints.  
26  
27  
28  
29  
30  
31  
32  
33  
34  
35  
36  
37  
38  
39  
40  
41  
42  
43  
44  
45  
46  
47  
48  
49  
50  
51  
52  
53  
54  
55  
56  
57  
58  
59  
60

Consequently, cognitive complaints exert negative effects on their daily living, QOL, work capability, and physical and psychological health.

## Limitations and implications for future research

There are two limitations in this study. Firstly, this study, as a pilot, only recruited study participants at a single medical center, and the sample size could not be representative of this population in general, although this study primarily offers significant insights into perceived cognitive complaints, contributing factors and consequences of cognitive impairment in cervical cancer survivors. Secondly, this study utilized a cross-sectional design and included study participants on the completion of primary cancer treatment in a short period of time. Future longitudinal research should be conducted to identify the trajectory of cognitive complaints over the cancer care continuum.

## Conclusion

This study adds new insights into the growing body of research on cognitive complaints by cancer survivors, in particular Chinese cervical cancer survivors. Improved understanding of cognitive complaints would subsequently facilitate the development of relevant therapeutic interventions for preventing, and providing supportive care services, such as educational and counseling services, to reduce cognitive impairment in women with cervical cancer.

1  
2  
3 **Acknowledgments:** Thanks for all participants voluntarily joining in this study and generously  
4  
5 sharing their views and concerns.  
6  
7

8  
9 **Contributors:** ZYC and ASKC are the main authors and designed this study and drafted this  
10  
11 manuscript. LXY conducted interviews, LXY and ZYC analyzed data independently. CCHC  
12  
13 made significant contribution in manuscript revisions.  
14  
15

16  
17 **Funding:** None.  
18  
19

20 **Competing interests:** The authors declare no conflicts of interest.  
21  
22

23 **Ethics approval:** This study was approved by the Medical Ethics Committee of Hunan Cancer  
24  
25 Hospital.  
26  
27

28  
29 **Data sharing statement:** No additional data are available.  
30  
31  
32  
33  
34  
35  
36  
37  
38  
39  
40  
41  
42  
43  
44  
45  
46  
47  
48  
49  
50  
51  
52  
53  
54  
55  
56  
57  
58  
59  
60

## References

1. Chen W, Zheng R, Baade PD, Zhang S, Zeng H, Bray F, et al. Cancer statistics in China, 2015. *CA: Cancer J Clin* 2016; 66: 115–132. doi: 10.3322/caac.21338.
2. Lange M, Rigal O, Clarisse B, Giffard B, Sevin E, Barillet M, et al. Cognitive dysfunctions in elderly cancer patients: a new challenge for oncologists. *Cancer Treat Rev* 2014; 40: 810-817. doi: 10.1016/j.ctrv.2014.03.003.
3. Treanor C, Donnelly M. Late effects of cancer and cancer treatment- a rapid review. *J Community Supportive Oncol* 2014; 12:137-148.
4. Craig CD, Monk BJ, Farley JH, Chase DM. Cognitive impairment in gynecologic cancers: a systematic review of current approaches to diagnosis and treatment. *Support Care Cancer* 2014; 22: 279-287. doi: 10.1007/s00520-013-2029-7.
5. Faubion SS, MacLaughlin KL, Long ME, Pruthi S, Casey PM. Surveillance and Care of the Gynecologic Cancer Survivor. *J Womens Health (Larchmt)* 2015; 24: 899-906. doi: 10.1089/jwh.2014.5127.
6. Wefel JS, Kesler SR, Noll KR, Schagen SB. Clinical characteristics, pathophysiology, and management of noncentral nervous system cancer-related cognitive impairment in adults. *CA Cancer J Clin* 2015; 65: 123-138. doi: 10.3322/caac.21258.
7. Janelins MC, Kesler SR, Ahles TA, Morrow GR. Prevalence, mechanisms, and management of cancer-related cognitive impairment. *Int Rev Psychiatry* 2014; 26:102–113. doi:10.3109/09540261.2013.864260.
8. Wefel JS, Schagen SB. Chemotherapy-related cognitive dysfunction. *Curr Neurol Neurosci Rep* 2012; 12: 267–275. doi:10.1007/s11910-012-0264-9

- 1  
2  
3  
4  
5  
6  
7  
8  
9  
10  
11  
12  
13  
14  
15  
16  
17  
18  
19  
20  
21  
22  
23  
24  
25  
26  
27  
28  
29  
30  
31  
32  
33  
34  
35  
36  
37  
38  
39  
40  
41  
42  
43  
44  
45  
46  
47  
48  
49  
50  
51  
52  
53  
54  
55  
56  
57  
58  
59  
60
9. Hines S, Ramis MA, Pike S, Chang AM. The effectiveness of psychosocial interventions for cognitive dysfunction in cancer patients who have received chemotherapy: a systematic review. *Worldviews Evid Based Nurs* 2014; 11:187-193. doi: 10.1111/wvn.12042.
10. Correa DD, Hess LM. Cognitive function and quality of life in ovarian cancer. *Gynecol Oncol* 2012; 124: 404-409. doi: 10.1016/j.ygyno.2011.11.005.
11. Zeng Y, Cheng ASK, Liu X, Feuerstein M. Symptom profiles, work productivity and quality of life among Chinese female cancer survivors. *Gynecol Obstet (Sunnyvale)* 2016; 6: 357. doi:10.4172/2161-0932.1000357
12. Henneghan A. Modifiable factors and cognitive dysfunction in breast cancer survivors: a mixed-method systematic review. *Support Care Cancer* 2016; 24(1):481–497. doi: 10.1007/s00520-015-2927-y.
13. Dutta V. Chemotherapy, neurotoxicity, and cognitive changes in breast cancer. *J Cancer Res Ther* 2011; 7: 264-269. doi: 10.4103/0973-1482.87008.
14. Hess LM, Chambers SK, Hatch K, Hallum A, Janicek MF, Buscema J et al. Pilot study of the prospective identification of changes in cognitive function during chemotherapy treatment for advanced ovarian cancer. *J Support Oncol* 2010; 8: 252-258.
15. Wu LM, Tanenbaum ML, Dijkers M, Amidi A, Hall SJ, Penedo FJ et al. Cognitive and neurobehavioral symptoms in patients with nonmetastatic prostate cancer treated with androgen deprivation therapy or observation: A mixed methods study. *Soc Sci Med* 2016; 156: 80-89. doi: 10.1016/j.socscimed.



- 1  
2  
3  
4  
5  
6  
7  
8  
9  
10  
11  
12  
13  
14  
15  
16  
17  
18  
19  
20  
21  
22  
23  
24  
25  
26  
27  
28  
29  
30  
31  
32  
33  
34  
35  
36  
37  
38  
39  
40  
41  
42  
43  
44  
45  
46  
47  
48  
49  
50  
51  
52  
53  
54  
55  
56  
57  
58  
59  
60
16. Boykoff N, Moieni M, Subramanian SK. Confronting chemobrain: an in-depth look at survivors' reports of impact on work, social networks, and health care response. *J Cancer Surviv* 2009; 3(4):223–232. doi:10.1007/s11764-009-0098-x.
  17. Hsieh H, Shannon S. Three approaches to qualitative content analysis. *Qual Health Res* 2005; 15 (9): 1277-1288. doi: 10.1177/1049732305276687.
  18. Von Ah D. Cognitive changes associated with cancer and cancer treatment: State of the science. *Clin J Oncol Nurs* 2015; 19, 47–56. doi:10.1188/15.CJON.19-01AP.
  19. Cheung YT, Shwe M, Tan YP, Fan G, Ng R, Chan A. Cognitive changes in multiethnic Asian breast cancer patients: a focus group study. *Ann Oncol* 2012; 23(10):2547–2552. doi: 10.1093/annonc/mds029.
  20. Zeng YC. E-mail interviewing Chinese hospital nurses' interpretations of work-related stress. *Asian J Nurs* 2008; 11 (2): 72-79.
  21. Munir F, Kalawsky K, Lawrence C, Yarker J, Haslam C, Ahmed S. Cognitive intervention for breast cancer patients undergoing adjuvant chemotherapy: a needs analysis. *Cancer Nurs* 2011; 34(5):385–392. doi:10.1097/NCC.0b013e31820254f3.
  22. Becker H, Henneghan A, Mikan SQ. When do I get my brain back? Breast cancer survivors' experiences of cognitive problems. *Clin J Oncol Nurs* 2015; 19(2):180-4. doi: 10.1188/15.CJON.180-184.
  23. Duijts SF, van Egmond MP, Spelten E, van Muijen P, Anema JR, van der Beek AJ. Physical and psychosocial problems in cancer survivors beyond return to work: A systematic review. *Psychooncology* 2014; 23: 481–492. doi: 10.1002/pon.3467.

1  
2  
3 24. Zeng YC, Cheng ASK, Chan CCH. Meta-analysis of the effects of neuropsychological  
4 interventions on cognitive function in non-central nervous system cancer survivors.  
5  
6 Integr Cancer Ther 2016; 1-11. doi: 10.1177/1534735416638737.  
7  
8  
9  
10  
11  
12  
13  
14  
15  
16  
17  
18  
19  
20  
21  
22  
23  
24  
25  
26  
27  
28  
29  
30  
31  
32  
33  
34  
35  
36  
37  
38  
39  
40  
41  
42  
43  
44  
45  
46  
47  
48  
49  
50  
51  
52  
53  
54  
55  
56  
57  
58  
59  
60

For peer review only

**Table 1** Demographic and clinical characteristics (N=31)

| Variables                                                          | Mean (SD)            | n (%)     |
|--------------------------------------------------------------------|----------------------|-----------|
| <b>Age (years) (range)</b>                                         | 45.06 (9.61) (19-57) |           |
| <b>Education levels</b>                                            |                      |           |
| Primary school or below                                            |                      | 17 (54.8) |
| High school                                                        |                      | 3 (9.7)   |
| College                                                            |                      | 7 (22.6)  |
| University or above                                                |                      | 4 (12.9)  |
| <b>Employment status</b>                                           |                      |           |
| Employed but on medical leave                                      |                      | 15 (48.4) |
| Unemployed or retired                                              |                      | 16 (51.6) |
| <b>Marital status</b>                                              |                      |           |
| Married                                                            |                      | 29 (93.5) |
| Divorced                                                           |                      | 2 (6.5)   |
| <b>Disease stage</b>                                               |                      |           |
| Stage IA                                                           |                      | 14 (45.2) |
| Stage IB-IIA                                                       |                      | 15 (48.4) |
| Stage IIB-IVA                                                      |                      | 2 (6.5)   |
| <b>Types of treatment</b>                                          |                      |           |
| Surgery                                                            |                      | 10 (32.3) |
| Surgery + chemotherapy                                             |                      | 8 (25.8)  |
| Surgery + radiation therapy                                        |                      | 2 (6.5)   |
| Surgery+radiation+chemotherapy                                     |                      | 8 (25.8)  |
| Radiation or chemotherapy                                          |                      | 3 (9.7)   |
| <b>Time since completion of primary treatment (months) (range)</b> | 1.22 (1.08) (0-5)    |           |

**Table 2** Major categories from the qualitative content analysis (N=31)

| Categories                                                            | n (%)     | Quotes from participants                                                                                                                                                                                                             |
|-----------------------------------------------------------------------|-----------|--------------------------------------------------------------------------------------------------------------------------------------------------------------------------------------------------------------------------------------|
| <b>Cognitive complaints</b>                                           |           |                                                                                                                                                                                                                                      |
| Lost concentration                                                    | 17(54.8)  | <i>It's difficult to focus on a conversation or when reading newspapers or books. My biggest problem is lack of concentration</i>                                                                                                    |
| Easily forgetting things or information told by others                | 15 (48.4) | <i>My memory changed a lot after chemotherapy; when I meet my friend on the road, I can't even remember her name. Sometimes, nurses tell me information about the illness, and I can't even remember what they have just told me</i> |
| Feeling it's hard to understand new things                            | 7 (22.6)  | <i>When I was reading some books, I saw the words, but I could not make sense of the words, even reading the same sentence several times.</i>                                                                                        |
| Difficulties in finding right word in general conversation            | 4 (12.9)  | <i>When I speak with someone in general conversation, it's hard for me to find the right words</i>                                                                                                                                   |
| Slowing down in working efficiency, compared with how they used to be | 2 (6.5)   | <i>I was used to being well organized in my work and daily life, but now it's hard to get back all those abilities, and work has slowed down a lot</i>                                                                               |
| <b>Perceived causing factors</b>                                      |           |                                                                                                                                                                                                                                      |
| Relating to chemotherapy                                              | 15 (48.4) | <i>Even during chemotherapy, I found that my memory changed a lot. Now I have completed the whole cycle of chemotherapy, and more and more memory impairment has appeared</i>                                                        |
| Side effects of cancer and its treatment                              | 12 (38.7) | <i>I believe lots of physical examinations, such as CT at the time of diagnosis, the use of analgesics, and the surgery procedure are all related to my cognitive problems</i>                                                       |
| Aging                                                                 | 8 (25.8)  | <i>Maybe due to my age, my memory is worse and I've started forgetting things quickly</i>                                                                                                                                            |
| Psychosocial issues                                                   | 3 (9.6)   | <i>Having to deal with too many sources of stress, such as the financial issues related to medical treatment</i>                                                                                                                     |
| Relating to immune function                                           | 2 (6.5)   | <i>After I got this disease and received this series of cancer treatments, my immune</i>                                                                                                                                             |

*function was destroyed, so my memory problems are partly due to this*

### **Coping strategies**

|                                                                               |           |                                                                                                                                                                                                                                                     |
|-------------------------------------------------------------------------------|-----------|-----------------------------------------------------------------------------------------------------------------------------------------------------------------------------------------------------------------------------------------------------|
| By writing memos                                                              | 15 (48.4) | <i>Writing down important things, use of diaries or phone reminders to organize daily tasks</i>                                                                                                                                                     |
| Self-adjustment and by relaxation techniques                                  | 14 (45.2) | <i>Asking myself to focus on one task at a time. When disturbed by other things or people, I'll adjust myself and refocus on what I was doing. By reading, or listening to music for focus</i>                                                      |
| Doing noting                                                                  | 6 (19.3)  | <i>Now I can do nothing for this problem (cognitive impairment), as this may be due to my age; with older age, cognitive decline appears naturally. Other patients believe these cognitive problems are reversible and may get better gradually</i> |
| Environment organization                                                      | 2 (6.5)   | <i>To keep important personal belongs such as keys, eyeglasses, mobile phone in a fixed place</i>                                                                                                                                                   |
| TCM such as acupuncture                                                       | 1 (3.2)   | <i>Doctors told me there were no effective drug therapies for this problem, so I tried acupuncture</i>                                                                                                                                              |
| <b>Supportive care needs from health care providers</b>                       |           |                                                                                                                                                                                                                                                     |
| Providing common symptoms of cognitive impairment and its effective therapies | 11 (35.5) | <i>It's great for doctors and nurses to tell me common signs or symptoms of cognitive impairments, and provide intervention therapies to treat these problems</i>                                                                                   |
| Providing counseling services to family members                               | 8 (25.8)  | <i>It's hard for me to remember so much information. Health care providers should provide educational information and more counseling service to my family members</i>                                                                              |
| Need information about possible rehabilitation service                        | 7 (22.6)  | <i>After hospital discharge, where should I seek further rehabilitation service for cognitive problems, or these problems can recover gradually</i>                                                                                                 |
| Offering peer support networks                                                | 2 (6.5)   | <i>At the time of diagnosis and during cancer treatment, I felt so worried. I need to connect with women who have had a similar experience, in order to share coping</i>                                                                            |

strategies

**Impacts on**

|                            |           |                                                                                                                                                                                                                                                                                                                                        |
|----------------------------|-----------|----------------------------------------------------------------------------------------------------------------------------------------------------------------------------------------------------------------------------------------------------------------------------------------------------------------------------------------|
| Daily lives                | 20 (64.5) | <i>Sometimes, when people talk with me, I immediately forget what they were talking about, or when I'm doing things and people interrupt me, I'll forget what I want to do</i>                                                                                                                                                         |
| Quality of life            | 9 (29.0)  | <i>This disease and its treatment have severely impacted all aspects of my life and left me feeling overwhelmed. Now I have poor memory, a slowed thinking process, and a large financial burden as a result of the medical costs, causing tension in my family relationship</i>                                                       |
| Psychological health       | 5 (16.1)  | <i>Sometimes my brain becomes blank, and it seems my memory could not come back, so I felt so frightened and scared</i>                                                                                                                                                                                                                |
| Work capability            | 3 (9.6)   | <i>I have to leave my job, due to my body image now, during and after chemotherapy I lost a lot of hair, and I can't work for very long, I can only work for a short period of time, then I have to rest</i>                                                                                                                           |
| Physical health conditions | 2 (6.5)   | <i>Cognitive function changes were not obvious, but my health condition was a lot worse;, before the cancer diagnosis, my health was OK. But now my sleep is not good, my immune system is much weaker, and due to the loss of physical energy I can't work too long and need to take a break after working for just a short while</i> |

---

Abbreviation: TCM, traditional Chinese medicine

**Fig. 1** A preliminary cognition model among cervical cancer survivors after cancer treatment

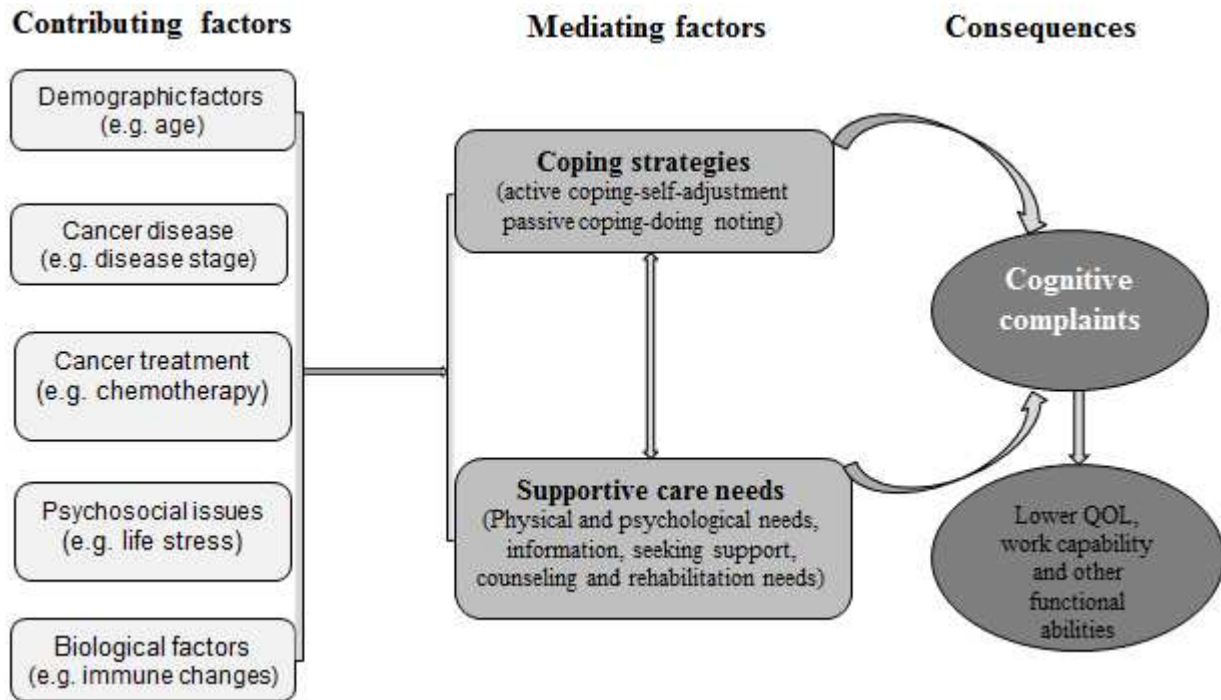

review only

STROBE 2007 (v4) Statement—Checklist of items that should be included in reports of *cross-sectional studies*

| Section/Topic                | Item # | Recommendation                                                                                                                                                                       | Reported on page # |
|------------------------------|--------|--------------------------------------------------------------------------------------------------------------------------------------------------------------------------------------|--------------------|
| Title and abstract           | 1      | (a) Indicate the study’s design with a commonly used term in the title or the abstract                                                                                               | 1                  |
|                              |        | (b) Provide in the abstract an informative and balanced summary of what was done and what was found                                                                                  | 2                  |
| <b>Introduction</b>          |        |                                                                                                                                                                                      |                    |
| Background/rationale         | 2      | Explain the scientific background and rationale for the investigation being reported                                                                                                 | 3-5                |
| Objectives                   | 3      | State specific objectives, including any prespecified hypotheses                                                                                                                     | 5                  |
| <b>Methods</b>               |        |                                                                                                                                                                                      |                    |
| Study design                 | 4      | Present key elements of study design early in the paper                                                                                                                              | 5                  |
| Setting                      | 5      | Describe the setting, locations, and relevant dates, including periods of recruitment, exposure, follow-up, and data collection                                                      | 6                  |
| Participants                 | 6      | (a) Give the eligibility criteria, and the sources and methods of selection of participants                                                                                          | 6                  |
| Variables                    | 7      | Clearly define all outcomes, exposures, predictors, potential confounders, and effect modifiers. Give diagnostic criteria, if applicable                                             | 6                  |
| Data sources/<br>measurement | 8*     | For each variable of interest, give sources of data and details of methods of assessment (measurement). Describe comparability of assessment methods if there is more than one group | 6                  |
| Bias                         | 9      | Describe any efforts to address potential sources of bias                                                                                                                            | 7                  |
| Study size                   | 10     | Explain how the study size was arrived at                                                                                                                                            | 7                  |
| Quantitative variables       | 11     | Explain how quantitative variables were handled in the analyses. If applicable, describe which groupings were chosen and why                                                         | 7                  |
| Statistical methods          | 12     | (a) Describe all statistical methods, including those used to control for confounding                                                                                                | N/A                |
|                              |        | (b) Describe any methods used to examine subgroups and interactions                                                                                                                  | N/A                |
|                              |        | (c) Explain how missing data were addressed                                                                                                                                          | N/A                |
|                              |        | (d) If applicable, describe analytical methods taking account of sampling strategy                                                                                                   | N/A                |
|                              |        | (e) Describe any sensitivity analyses                                                                                                                                                | N/A                |
| <b>Results</b>               |        |                                                                                                                                                                                      |                    |

1  
2  
3  
4  
5  
6  
7  
8  
9  
10  
11  
12  
13  
14  
15  
16  
17  
18  
19  
20  
21  
22  
23  
24  
25  
26  
27  
28  
29  
30  
31  
32  
33  
34  
35  
36  
37  
38  
39  
40  
41  
42  
43  
44  
45  
46  
47  
48  
49



|                          |     |                                                                                                                                                                                                              |            |
|--------------------------|-----|--------------------------------------------------------------------------------------------------------------------------------------------------------------------------------------------------------------|------------|
| Participants             | 13* | (a) Report numbers of individuals at each stage of study—eg numbers potentially eligible, examined for eligibility, confirmed eligible, included in the study, completing follow-up, and analysed            | 7          |
|                          |     | (b) Give reasons for non-participation at each stage                                                                                                                                                         | 7          |
|                          |     | (c) Consider use of a flow diagram                                                                                                                                                                           | 7          |
| Descriptive data         | 14* | (a) Give characteristics of study participants (eg demographic, clinical, social) and information on exposures and potential confounders                                                                     | 7          |
|                          |     | (b) Indicate number of participants with missing data for each variable of interest                                                                                                                          | 7          |
| Outcome data             | 15* | Report numbers of outcome events or summary measures                                                                                                                                                         | 8          |
| Main results             | 16  | (a) Give unadjusted estimates and, if applicable, confounder-adjusted estimates and their precision (eg, 95% confidence interval). Make clear which confounders were adjusted for and why they were included | 8          |
|                          |     | (b) Report category boundaries when continuous variables were categorized                                                                                                                                    | 8, Table 2 |
|                          |     | (c) If relevant, consider translating estimates of relative risk into absolute risk for a meaningful time period                                                                                             | 9          |
| Other analyses           | 17  | Report other analyses done—eg analyses of subgroups and interactions, and sensitivity analyses                                                                                                               | N/A        |
| <b>Discussion</b>        |     |                                                                                                                                                                                                              |            |
| Key results              | 18  | Summarise key results with reference to study objectives                                                                                                                                                     | 9          |
| Limitations              | 19  | Discuss limitations of the study, taking into account sources of potential bias or imprecision. Discuss both direction and magnitude of any potential bias                                                   | 12         |
| Interpretation           | 20  | Give a cautious overall interpretation of results considering objectives, limitations, multiplicity of analyses, results from similar studies, and other relevant evidence                                   | 10-11      |
| Generalisability         | 21  | Discuss the generalisability (external validity) of the study results                                                                                                                                        | 10-11      |
| <b>Other information</b> |     |                                                                                                                                                                                                              |            |
| Funding                  | 22  | Give the source of funding and the role of the funders for the present study and, if applicable, for the original study on which the present article is based                                                | 13         |

\*Give information separately for cases and controls in case-control studies and, if applicable, for exposed and unexposed groups in cohort and cross-sectional studies.

**Note:** An Explanation and Elaboration article discusses each checklist item and gives methodological background and published examples of transparent reporting. The STROBE checklist is best used in conjunction with this article (freely available on the Web sites of PLoS Medicine at <http://www.plosmedicine.org/>, Annals of Internal Medicine at <http://www.annals.org/>, and Epidemiology at <http://www.epidem.com/>). Information on the STROBE Initiative is available at [www.strobe-statement.org](http://www.strobe-statement.org).

# BMJ Open

## Cognitive complaints and supportive care needs in Chinese cervical cancer survivors: a qualitative study

|                                 |                                                                                                                                                                                                                                                                                                                                                                                                                        |
|---------------------------------|------------------------------------------------------------------------------------------------------------------------------------------------------------------------------------------------------------------------------------------------------------------------------------------------------------------------------------------------------------------------------------------------------------------------|
| Journal:                        | <i>BMJ Open</i>                                                                                                                                                                                                                                                                                                                                                                                                        |
| Manuscript ID                   | bmjopen-2016-014078.R1                                                                                                                                                                                                                                                                                                                                                                                                 |
| Article Type:                   | Research                                                                                                                                                                                                                                                                                                                                                                                                               |
| Date Submitted by the Author:   | 14-Dec-2016                                                                                                                                                                                                                                                                                                                                                                                                            |
| Complete List of Authors:       | Zeng, Y; The Hong Kong Polytechnic University, Department of Rehabilitatoin Sciences; The Third Affiliated Hospital of Guangzhou Medical University, Research Institute of Gynecology and Obstetrics<br>Cheng, Andy; The Hong Kong Polytechnic University<br>Liu, Xiangyu; Hunan Cancer Hospital, Department of Nursing<br>Chan, Chetwyn ; The Hong Kong Polytechnic University, Department of Rehabilitatoin Sciences |
| <b>Primary Subject Heading</b>: | Qualitative research                                                                                                                                                                                                                                                                                                                                                                                                   |
| Secondary Subject Heading:      | Oncology, Qualitative research                                                                                                                                                                                                                                                                                                                                                                                         |
| Keywords:                       | Cervical cancer, Survivors, Cognitive complaints, Supportive care needs                                                                                                                                                                                                                                                                                                                                                |
|                                 |                                                                                                                                                                                                                                                                                                                                                                                                                        |

SCHOLARONE™  
Manuscripts

1  
2  
3 1 **Title: Cognitive complaints and supportive care needs in Chinese cervical cancer survivors:**  
4  
5  
6 2 **a qualitative study**  
7  
8 3

9  
10 4 Yingchun Zeng<sup>1,2</sup>, MPhil, PhD Candidate; Andy SK Cheng<sup>1</sup>, PhD; Xiangyu Liu<sup>3</sup>, Chetwyn  
11  
12 5 CH Chan<sup>1</sup>, PhD  
13  
14 6

15  
16  
17 7 **Author Affiliations:**

18  
19  
20 8 <sup>1</sup>Department of Rehabilitation Sciences, The Hong Kong Polytechnic University, Hong Kong,  
21  
22 9 China

23  
24 10 <sup>2</sup>Research Institute of Gynaecology and Obstetrics, The Third Affiliated Hospital of  
25  
26 11 Guangzhou Medical University, Guangzhou, China

27  
28  
29 12 <sup>3</sup>Department of Nursing, Hunan Cancer Hospital, Changsha, China  
30  
31  
32 13

33  
34 14  
35  
36 15 **Correspondence:** Dr Andy Cheng, Department of Rehabilitation Sciences, The Hong Kong  
37  
38 16 Polytechnic University, Hung Hom, Hong Kong, China (Email:  
39  
40 17 andy.sk.cheng@polyu.edu.hk).  
41  
42  
43 18  
44  
45  
46 19  
47  
48  
49  
50  
51  
52  
53  
54  
55  
56  
57  
58  
59  
60

1  
2  
3 **1 Abstract**  
4

5  
6 **2 Objectives:** This study aims to explore perceived cognitive complaints and relevant supportive  
7  
8  
9 care needs in Chinese cervical cancer survivors after primary cancer treatment.  
10

11  
12 **4 Design:** This study utilised a qualitative research design. A semi-structured interview was used  
13  
14  
15 to probe cervical cancer patients' perceived cognitive complaints and supportive care needs.  
16

17  
18 **6 Setting:** This study was conducted in a secondary cancer care centre located in South China.  
19

20  
21 **7 Participants:** 31 women with cervical cancer after primary cancer treatment, aged 18-60 years  
22  
23  
24 old, were purposively selected using non-random sampling procedures.  
25

26  
27 **9 Results:** A total of 31 cervical cancer survivors joined this study. Of that total, 20 women  
28  
29  
30 (64.5%) reported cognitive complaints after cancer treatment. The most common complaint was  
31  
32  
33 loss of concentration (n=17, 54.8%). Perceived contributing factors to these cognitive complaints  
34  
35  
36 included chemotherapy (n=15, 48.4%), and aging (n=8, 25.8%). These cognitive problems most  
37  
38  
39 commonly impacted their daily living (n=20, 64.5%). Common supportive care needs include  
40  
41  
42 symptom management strategies (n=11, 35.5%), and counselling services (n=8, 25.8%).  
43

44  
45 **15 Conclusion:** This study adds new insights into the growing body of research on cognitive  
46  
47  
48 complaints by cancer survivors, in particular Chinese cervical cancer survivors. Improved  
49  
50  
51 understanding of cognitive complaints would subsequently facilitate the development of relevant  
52  
53  
54 therapeutic interventions for prevention, and the provision of supportive care services, such as  
55  
56  
57 educational and counselling services, to reduce cognitive impairment in women with cervical  
58  
59  
60 cancer.  
21

## 1 Study strengths and limitations

- 2 • This qualitative study fully identified common cognitive complaints and supportive care  
3 needs, as well as how these complaints and unmet needs impact patients' QOL. The study  
4 also obtained information about coping strategies to ameliorate cognitive complaints.
- 5 • A major strength of this qualitative study was its use of the COREQ checklist for  
6 guidance and to ensure rigour.
- 7 • This preliminary study only recruited study participants at a single medical centre, which  
8 could limit the transferability of study findings.
- 9 • This study included study participants who had completed primary cancer treatment in a  
10 short period of time; longitudinal research should be conducted to identify the trajectory  
11 of cognitive complaints over the cancer care continuum.

12 **Keywords** Cervical cancer. Survivors. Cognitive complaints. Supportive care needs.

## 1 Introduction

2 Cervical cancer is the second most common cancer, followed by breast cancer, among women in  
3 China.<sup>1</sup> Due to medical advancements in early detection and the possibility of curative cancer  
4 treatment,<sup>2</sup> the five-year relative survival rate of cervical cancer in mainland China is up to 69%  
5 for all stages.<sup>1</sup> As more cervical cancer survivors are living longer after curative treatment, late  
6 effects of cancer treatment are becoming increasingly common.<sup>3</sup> One such long-term and late  
7 effect is neurocognitive, which has emerged as a significant problem affecting cervical cancer  
8 survivors.<sup>4,5</sup>

9 Cognitive complaints often refer to cognitive impairment or cancer-related cognitive  
10 impairment.<sup>6,7</sup> Other studies have described this as chemotherapy-related cognitive dysfunction,  
11 colloquially named ‘chemo brain’ or ‘chemo fog’.<sup>8,9</sup> Cognitive complaints have the potential to  
12 significantly impact both social and occupational functioning, interfering with the ability to carry  
13 out normal daily activities, all of which in turn contributes to lower quality of life (QOL) in  
14 cancer survivors.<sup>4,6,10</sup> Cognitive complaints have been reported in approximately 40% of patients  
15 prior to any cancer treatment, and as many as 75% of patients indicate some degree of cognitive  
16 impairment during the period of active cancer treatment. Finally, cognitive complaints are still  
17 present in up to 60% of long-term cancer survivors.<sup>6</sup> In a study conducted in mainland China,  
18 female cancer survivors with an average of 2.79 years post- primary treatment reported higher  
19 levels of cognitive limitations, significantly reducing their work productivity and global QOL.<sup>11</sup>

20 There are quantitative research approaches employed to explore cognitive complaints and related  
21 supportive care issues among cancer survivors,<sup>4,12</sup> and these researchers have proposed that  
22 quantitative cognitive measures are more objective and reliable than qualitative exploration of

1  
2  
3 1 cognitive problems in cancer survivors.<sup>13,14</sup> However, other researchers have argued there are  
4  
5 2 inherent difficulties with a quantitative approach, in terms of fully appreciating cognitive  
6  
7 3 complaints by cancer patients.<sup>4,15</sup> Qualitative research studies would enable us to identify the  
8  
9 4 presence of cognitive symptoms that quantitative approaches cannot detect, either by self-  
10  
11 5 reported cognitive measures or neurocognitive tests.<sup>15</sup> In addition, qualitative in-depth interviews  
12  
13 6 could provide information about how cognitive impairment impacts cancer patients' QOL, and  
14  
15 7 could allow researchers to obtain rich information about numerous coping strategies to  
16  
17 8 ameliorate cognitive dysfunction symptoms, as well as develop intervention strategies.<sup>15</sup>  
18  
19  
20 9 Therefore, there is a need for a qualitative study to explore perceived cognitive complaints and  
21  
22 10 relevant supportive care needs in cervical cancer survivors after primary cancer treatment. A  
23  
24 11 clear understanding of cognitive complaints experienced by cervical cancer survivors, through  
25  
26 12 qualitative in-depth interviews, could aid health care providers in developing targeted  
27  
28 13 interventions, as well as in providing relevant supportive care services for alleviating the extent  
29  
30 14 and impact of cognitive complaints in cancer survivors.<sup>16</sup>  
31  
32  
33  
34  
35  
36  
37  
38  
39  
40  
41  
42  
43  
44  
45  
46  
47  
48  
49  
50  
51  
52  
53  
54  
55  
56  
57  
58  
59  
60

## 16 **Methods**

### 17 *Design*

18 This study utilised a qualitative research design. A semi-structured interview was used to probe  
19 cervical cancer patients' perceived cognitive complaints and supportive care needs.

## 1 *Study framework*

2 This study was guided by the conceptual model of chemotherapy-related changes in cognitive  
3 function proposed by Myers.<sup>17</sup> This model consists of three key components: antecedents (cancer  
4 diagnosis and cancer treatment), mediators (physiologic, psychosocial and situational factors),  
5 and consequences (quality of life and functional ability).<sup>17</sup> While this model is named  
6 chemotherapy-related cognitive impairment, recent evidence indicates that cancer itself is also  
7 related to cognitive impairment.<sup>6</sup> As suggested by Myers, when researchers learn more about the  
8 physiological and psychological aspects of cognitive impairment, this model will require  
9 refining.<sup>17</sup>

## 10 *Study sample*

11 All study participants were recruited from the Gynaecological Oncology Unit in a cancer  
12 hospital. This study obtained ethical approval from the hospital's ethics committee. A purposive  
13 sampling was drawn to recruit eligible informants. Inclusion criteria were: women who were at  
14 least 18 years old, with a primary diagnosis of cervical cancer, who had completed their primary  
15 cancer treatment of surgery, radiation therapy or chemotherapy. Exclusion criteria included  
16 potential psychiatric disorders, previous cancer history, or traumatic brain injury.

## 17 *Study procedure and qualitative interviews*

18 After obtaining written consent, eligible participants were invited to participate in a semi-  
19 structured interview, and complete a socio-demographic sheet. This sheet was used to collect  
20 information on demographic and clinical characteristics, including age, education level, marital  
21 status, stage of tumour, type of cancer treatment received, and time since completion of primary  
22 cancer treatment. Qualitative interviews were guided by a narrative epistemology so as to



1 facilitate informants in providing narrative accounts of their perceived experience.<sup>18</sup> The  
2 interviewer was an experienced research nurse who was not the staff nurse in the research setting  
3 of the Gynaecological Oncology Unit, and the data collection method was by written narrative,  
4 so that the interviewer's beliefs, biases or preconceptions would have no influence on the  
5 direction of the interviews. The interviewer only remained in the meeting room to take field  
6 notes, in order to obtain any emerging thoughts to guide data analysis.

7 The interviews were conducted face-to-face at the in-patient ward's meeting room. All  
8 interviews utilised an interview guide composed of the following open-ended questions: 1)  
9 Compared to before your cancer diagnosis, tell us about the overall change in your cognitive  
10 abilities? For example, perceptions of understanding what people say to you, thinking of the right  
11 word when responding to others, feeling confident in completing a task or taking on new tasks? 2)  
12 What do you think the common contributing factors to any cognitive changes might be? 3) How  
13 do these perceived cognitive changes impact your daily life or your ability to work? 4) How do  
14 you deal with these changes? In other words, what types of coping strategies do you use as a  
15 result of any cognitive changes you might be experiencing? 5) What types of supportive care  
16 services would you like to seek from health care providers to help you cope with any cognitive  
17 complaints? Each interview lasted 30 to 45 minutes, and was recorded by a digital recorder and  
18 transcribed verbatim. Data saturation was achieved much earlier than the final sample size of 31  
19 patients with cervical cancer, as data collection and analysis were performed simultaneously in  
20 an iterative process.<sup>19</sup>

## 1 **Data analysis**

2 Qualitative interview data were transcribed to produce a verbatim transcript. During the entire  
3 data analysis process, the researcher consciously separated herself from those biases, in order to  
4 be open to the information shared by study participants. NVivo 11 qualitative software  
5 (<http://www.qsrinternational.com/nvivo-product/nvivo11-for-windows>) was applied to organise  
6 and code the verbatim transcript. Qualitative content analysis was used to prepare, organise, and  
7 report the data.<sup>20</sup> A three-step content analysis process was followed: "1) *The verbatim transcript*  
8 *was organised into meaning units (such as words, phrases, sentences, or paragraphs that*  
9 *conveyed similar content deemed important to understanding the patients' experiences).* 2) *The*  
10 *meaning units were coded and categorised.* 3) *The abstraction process was guided by Myers's*  
11 *conceptual model and continued until primary themes were identified.*<sup>20</sup>

12 Two research members conducted content analysis independently. For any disagreement with the  
13 interpretation of clusters or categories, a third research member was involved in the discussion  
14 process, in order to establish consensus. To ensure the study findings were accurately reflecting  
15 informants' truly perceived experience of cognitive changes. Three women were invited to check  
16 the final verbatim transcript for the purpose of collecting participants' feedback and validation.  
17 The consolidated criteria for reporting qualitative studies (COREQ) checklist was applied to  
18 guide this study and ensure study rigour (Appendix 1).<sup>21</sup>

## 19 20 **Results**

21 A total of 50 patients with cervical cancer were approached, with 31 agreeing to participate in  
22 this written narrative interview. The women who did not agree to join this study had no interest

1  
2  
3 1 in participating in any research. Their characteristics in terms of age, cancer stage and treatment  
4  
5 2 types were comparable to the patients who completed written interviews. Of the 31 participants,  
6  
7  
8 3 20 women (64.5%) reported cognitive complaints after cancer treatment. The socio-demographic  
9  
10 4 and clinical characteristics of women with cognitive impairment are listed in Table 1. The mean  
11  
12 5 age was 46.40 (9.80), ranging from 19 to 57 years old. More than half of the participants had  
13  
14 6 lower education levels (n=11, 55.0). All of these women were currently unemployed or on  
15  
16 7 medical leave, as the mean duration of time since completion of primary cancer treatment was  
17  
18 8 1.70 (1.03) months. Almost all of the participants were married (n=19, 95.0%). Only two women  
19  
20 9 were in an advanced stage of disease (n=2, 10.0%). Most women had had surgery (n=18, 90.0%),  
21  
22 10 more than half had had chemotherapy (n=11, 55.0%), and 12 women had undergone radiation  
23  
24 11 therapy (38.7%).  
25  
26  
27  
28  
29

30 12 Major categories that emerged from the data included cognitive complaints, perceived  
31  
32 13 contributing factors, impacts of cognitive problems on women's daily lives, health outcomes and  
33  
34 14 work capabilities, coping strategies and supportive care needs from health care providers are  
35  
36 15 shown in Table 2. The most common complaint was loss of concentration (n=17, 54.8%),  
37  
38 16 followed by memory problems (n=15, 48.4%). Other common cognitive complaints included  
39  
40 17 difficulties in learning new things, language issues (finding the right word to respond in  
41  
42 18 everyday conversations), and a slowed rate of information processing.  
43  
44  
45  
46  
47

48 19 The participants identified several factors that they believed were contributing to their cognitive  
49  
50 20 complaints, including chemotherapy (n=15, 48.4%), side effects of cancer and other treatment,  
51  
52 21 such as surgery or radiation therapy (n=12, 38.7%), and aging (n=8, 25.8%). These cognitive  
53  
54 22 complaints had negative impacts on their daily lives, sleep and rest (n=20, 64.5%). Two  
55  
56 23 participants indicated their cognitive function had seen negligible change, but their physical  
57  
58  
59  
60

1 health had deteriorated significantly after their cervical cancer diagnosis. While ten women who  
2 were on medical leave at the time of data collection, two women indicated they were planning to  
3 leave their jobs due to loss of concentration and slowed information processing capacity.

4 As shown in Table 2, the most commonly used coping strategies were memo writing (n=15,  
5 48.4%), and self-adjustment (n=14, 45.2%). Other coping strategies include “doing nothing” and  
6 organisation of their environment. In addition, one woman sought acupuncture as an alternative  
7 therapy for her cognitive problems, as she had been told by her physician that there was no  
8 effective medication for cognitive impairment thus far. Chinese cervical cancer survivors  
9 describe a variety of supportive care needs, such as the need for education on common signs and  
10 symptoms of cognitive impairment and effective treatment therapies (n=11, 35.5%), providing  
11 counselling service to family members (n=8, 25.8%), and information on further rehabilitation  
12 services (n=7, 22.6%). Two women expressed the need for peer support, and suggested that  
13 health care providers could organise a peer support service for patients starting from the  
14 diagnosis stage onward. Several patients indicated that their health care providers had never  
15 mentioned cognitive impairment issues, and only mentioned this when patients asked about  
16 cognitive problems that appeared during cancer treatment.

17 Based on the conceptual model of chemotherapy-related changes in cognitive function proposed  
18 by Myers (2009), and in combination with a synthesis of these qualitative findings, a refinement  
19 cognition model among cervical cancer survivors is illustrated in Figure 1. Cognitive complaints  
20 are multifactorial in nature, and contributing factors include demographic characteristics,  
21 biological factors, psychological distress, disease stage and cancer therapies.

22

## 1 Discussion

2 This is one of the first published studies exploring cognitive complaints in Chinese cervical  
3 cancer survivors, while there is accumulating evidence documenting cognitive impairment issues  
4 among cancer survivors, mainly dominated by breast cancer survivors.<sup>22</sup> The prevalence of  
5 cognitive complaints among Chinese cervical cancer survivors was 64.5%, which is consistent  
6 with previous research.<sup>6</sup> Yet since this study, as a preliminary, adopted a small and non-random  
7 sample, epidemiological studies are needed to further quantify the prevalence, impact and extent  
8 of cognitive complaints in this study population.<sup>23</sup>

9 Concurring with previous research evidence, chemotherapy and the side effects of cancer are the  
10 most common factors associated with cognitive complaints.<sup>4,7</sup> This study identified that cervical  
11 cancer survivors perceive aging as a likely contributing factor in cognitive impairment. These  
12 participants took “aging as a normal process of cognitive decline,” and viewed cognitive  
13 impairment as a process that could not be changed. Consistent with previous studies,<sup>17,24</sup>  
14 participants in this study also reported that symptoms of worry, fatigue and pain seem to be  
15 related to cognitive impairment.

16 The patient experience of cancer-related changes in cognition may be the commonalities of the  
17 phenomenon across tumour types,<sup>25</sup> as this study did not find unique cognitive deficits in women  
18 with cervical cancer. Yet this study did identify some unique cultural issues for Chinese women  
19 in terms of coping strategies for cognitive impairment. Some women did nothing to try to cope  
20 with their cognitive complaints. ‘Doing nothing’ as a common coping strategy for cognitive  
21 complaints could be related to the Chinese Taoist philosophy: “Accepting the fact that a situation  
22 cannot be changed, and telling oneself that one should do little, as things will be all right at the

1  
2  
3 1 end of the day".<sup>26</sup> Hence, coping strategies of doing nothing and self-adjustment could help these  
4  
5  
6 2 survivors maintain a sense of calm when facing difficulties that cannot be changed.

7  
8  
9 3 As in previous studies,<sup>4,6,7</sup> findings from this study also revealed that cognitive complaints had a  
10  
11 4 variety of consequences that impacted daily living, QOL, physical and psychological health, and  
12  
13  
14 5 work capabilities. While research into the relationship between cognitive functioning and work  
15  
16 6 ability is still in its infancy,<sup>27</sup> returning to work is a critical milestone for many survivors, since  
17  
18 7 work plays a key role in one's psychological, economic, and social wellbeing.<sup>28</sup> If cancer  
19  
20  
21 8 survivors were able to obtain individualised support and work-related adjustments from their  
22  
23 9 employer, they would be more likely to continue working.<sup>23</sup> Hence, cognitive complaints in  
24  
25  
26 10 cancer survivors generate numerous supportive care requirements, not only in the workplace, but  
27  
28 11 also from health care providers.

29  
30  
31 12 Common supportive care needs from health care providers include providing information about  
32  
33 13 common signs of cognitive symptoms and management strategies, effective treatment therapies  
34  
35  
36 14 and possible rehabilitation services, in order to manage cognitive problems. Although many  
37  
38 15 health care providers may gloss over the issue of patient cognitive complaints, believing they  
39  
40 16 have no curative treatment to offer patients,<sup>29</sup> findings from a meta-analysis indicate that  
41  
42  
43 17 neuropsychological interventions (cognitive rehabilitation, cognitive training and  
44  
45 18 neuromodulation strategies) can improve cognitive function in cancer survivors.<sup>30</sup> In particular, a  
46  
47  
48 19 recent Cochrane review indicates that cognitive training may be effective in improving patients'  
49  
50 20 cognitive function, as well as quality of life.<sup>31</sup> Additionally, behavioural intervention strategies  
51  
52  
53 21 (increasing physical activities and fostering supportive social relationships) could be helpful in  
54  
55 22 improving cognitive function among cancer survivors.<sup>12</sup>

1  
2  
3 1 By a synthesis of these study findings, a preliminary cognition model for cervical cancer  
4  
5 2 survivors after cancer treatment was established, to provide a theoretical underpinning for the  
6  
7 3 perception of cognitive complaints, contributing factors, mediating factors, and the consequences  
8  
9 4 of cognitive impairment in this study population. This model may be able to inform and  
10  
11 5 stimulate further intervention studies. Certainly, this preliminary cognition model of cervical  
12  
13 6 cancer survivors after cancer treatment can be continuously refined by further empirical research  
14  
15 7 investigations. Overall, this model illustrates coping strategies at a personal level by self-  
16  
17 8 adjustment or by doing nothing; and supportive care services, such as educational and  
18  
19 9 counselling services for family members by health care providers could mitigate the extent of the  
20  
21 10 consequences of cognitive impairment. In addition, participants felt a great need for support,  
22  
23 11 such as peer support, from diagnosis onwards, as well as for information on available  
24  
25 12 rehabilitation services and counselling, to modulate the degree of cognitive complaints.  
26  
27 13 Consequently, cognitive complaints exert negative effects on their daily living, QOL, work  
28  
29 14 capability, and physical and psychological health.  
30  
31  
32  
33  
34  
35  
36

### 37 **Limitations and implications for future research**

38  
39  
40 16 There are two limitations in this study. Firstly, this preliminary study only recruited study  
41  
42 17 participants at a single medical centre, and the sample size could not be representative of this  
43  
44 18 population in general, although this study primarily offers significant insights into perceived  
45  
46 19 cognitive complaints, contributing factors and consequences of cognitive impairment in cervical  
47  
48 20 cancer survivors. Secondly, this study utilised a cross-sectional design and included study  
49  
50 21 participants on the completion of primary cancer treatment in a short period of time. Future  
51  
52 22 longitudinal research should be conducted to identify the trajectory of cognitive complaints over  
53  
54 23 the cancer care continuum. As suggested by Myers,<sup>25</sup> qualitative studies do provide valuable  
55  
56  
57  
58  
59  
60

1  
2  
3 1 information to healthcare professionals about the impact that cognitive changes have on cancer  
4  
5 2 patients' QOL and daily function. Understanding cancer patients' experience of cognitive  
6  
7 3 impairment, their coping strategies and supportive care needs could help healthcare professionals  
8  
9 4 develop interventions to prevent, mitigate, and treat the cognitive sequelae of cancer and its  
10  
11 5 treatment therapies.<sup>25</sup>  
12  
13  
14  
15  
16  
17  
18  
19

## 20 7 **Conclusion**

21  
22 8 This study adds new insights into the growing body of research on cognitive complaints by  
23  
24 9 cancer survivors, in particular Chinese cervical cancer survivors. Improved understanding of  
25  
26 10 cognitive complaints would subsequently facilitate the development of relevant therapeutic  
27  
28 11 interventions for prevention, and providing supportive care services, such as educational and  
29  
30 12 counselling services, to reduce cognitive impairment in women with cervical cancer.  
31  
32  
33  
34  
35  
36  
37  
38  
39  
40  
41  
42  
43  
44  
45  
46  
47  
48  
49  
50  
51  
52  
53  
54  
55  
56  
57  
58  
59  
60



1  
2  
3 1 **Acknowledgments:** Thanks to all participants who voluntarily joined this study and generously  
4  
5  
6 2 shared their views and concerns.  
7

8  
9 3 **Contributors:** ZYC and ASKC are the main authors and designed this study and drafted this  
10  
11 4 manuscript. LXY conducted interviews, LXY and ZYC analysed data independently. CCHC  
12  
13 5 made a significant contribution to the manuscript revisions.  
14

15  
16  
17 6 **Funding:** None.  
18

19  
20 7 **Competing interests:** The authors declare no conflicts of interest.  
21

22  
23 8 **Ethics approval:** This study was approved by the Medical Ethics Committee of Hunan Cancer  
24  
25 9 Hospital.  
26

27  
28  
29 10 **Data sharing statement:** No additional data are available.  
30  
31

32 11  
33  
34  
35  
36  
37  
38  
39  
40  
41  
42  
43  
44  
45  
46  
47  
48  
49  
50  
51  
52  
53  
54  
55  
56  
57  
58  
59  
60

## 1 References

- 1 1. Chen W, Zheng R, Baade PD, Zhang S, Zeng H, Bray F, et al. Cancer statistics in China,  
2 2015. *CA: Cancer J Clin* 2016; 66: 115–132. doi: 10.3322/caac.21338.
- 3 2. Lange M, Rigal O, Clarisse B, Giffard B, Sevin E, Barillet M, et al. Cognitive  
4 dysfunctions in elderly cancer patients: a new challenge for oncologists. *Cancer Treat*  
5 *Rev* 2014; 40: 810-817. doi: 10.1016/j.ctrv.2014.03.003.
- 6 3. Treanor C, Donnelly M. Late effects of cancer and cancer treatment- a rapid review. *J*  
7 *Community Supportive Oncol* 2014; 12:137-148.
- 8 4. Craig CD, Monk BJ, Farley JH, Chase DM. Cognitive impairment in gynecologic cancers:  
9 a systematic review of current approaches to diagnosis and treatment. *Support Care*  
10 *Cancer* 2014; 22: 279-287. doi: 10.1007/s00520-013-2029-7.
- 11 5. Faubion SS, MacLaughlin KL, Long ME, Pruthi S, Casey PM. Surveillance and Care of  
12 the Gynecologic Cancer Survivor. *J Womens Health (Larchmt)* 2015; 24: 899-906. doi:  
13 10.1089/jwh.2014.5127.
- 14 6. Wefel JS, Kesler SR, Noll KR, Schagen SB. Clinical characteristics, pathophysiology,  
15 and management of noncentral nervous system cancer-related cognitive impairment in  
16 adults. *CA Cancer J Clin* 2015; 65: 123-138. doi: 10.3322/caac.21258.
- 17 7. Janelins MC, Kesler SR, Ahles TA, Morrow GR. Prevalence, mechanisms, and  
18 management of cancer-related cognitive impairment. *Int Rev Psychiatry* 2014; 26:102–  
19 113. doi:10.3109/09540261.2013.864260.
- 20 8. Wefel JS, Schagen SB. Chemotherapy-related cognitive dysfunction. *Curr Neurol*  
21 *Neurosci Rep* 2012; 12: 267–275. doi:10.1007/s11910-012-0264-9

- 1  
2  
3 1 9. Hines S, Ramis MA, Pike S, Chang AM. The effectiveness of psychosocial interventions  
4  
5 2 for cognitive dysfunction in cancer patients who have received chemotherapy: a  
6  
7 3 systematic review. *Worldviews Evid Based Nurs* 2014; 11:187-193. doi:  
8  
9 4 10.1111/wvn.12042.
- 10  
11 5 10. Correa DD, Hess LM. Cognitive function and quality of life in ovarian cancer. *Gynecol*  
12  
13 6 *Oncol* 2012; 124: 404-409. doi: 10.1016/j.ygyno.2011.11.005.
- 14  
15 7 11. Zeng Y, Cheng ASK, Liu X, Feuerstein M. Symptom profiles, work productivity and  
16  
17 8 quality of life among Chinese female cancer survivors. *Gynecol Obstet (Sunnyvale)* 2016;  
18  
19 9 6: 357. doi:10.4172/2161-0932.1000357
- 20  
21 10 12. Henneghan A. Modifiable factors and cognitive dysfunction in breast cancer survivors: a  
22  
23 11 mixed-method systematic review. *Support Care Cancer* 2016; 24(1):481–497. doi:  
24  
25 12 10.1007/s00520-015-2927-y.
- 26  
27 13 13. Dutta V. Chemotherapy, neurotoxicity, and cognitive changes in breast cancer. *J Cancer*  
28  
29 14 *Res Ther* 2011; 7: 264-269. doi: 10.4103/0973-1482.87008.
- 30  
31 15 14. Hess LM, Chambers SK, Hatch K, Hallum A, Janicek MF, Buscema J et al. Pilot study of  
32  
33 16 the prospective identification of changes in cognitive function during chemotherapy  
34  
35 17 treatment for advanced ovarian cancer. *J Support Oncol* 2010; 8: 252-258.
- 36  
37 18 15. Wu LM, Tanenbaum ML, Dijkers M, Amidi A, Hall SJ, Penedo FJ et al. Cognitive and  
38  
39 19 neurobehavioral symptoms in patients with nonmetastatic prostate cancer treated with  
40  
41 20 androgen deprivation therapy or observation: A mixed methods study. *Soc Sci Med* 2016;  
42  
43 21 156: 80-89. doi: 10.1016/j.socscimed.
- 44  
45  
46  
47  
48  
49  
50  
51  
52  
53  
54  
55  
56  
57  
58  
59  
60

- 1  
2  
3  
4 1 16. Boykoff N, Moieni M, Subramanian SK. Confronting chemobrain: an in-depth look at  
5  
6 2 survivors' reports of impact on work, social networks, and health care response. *J Cancer*  
7  
8 3 *Surviv* 2009; 3(4):223–232. doi:10.1007/s11764-009-0098-x.
- 9  
10 4 17. Myers JS. A comparison of the theory of unpleasant symptoms and the conceptual model  
11  
12 5 of chemotherapy-related changes in cognitive function. *Oncol Nurs Forum*  
13  
14 6 2009;36(1):E1-10. doi: 10.1188/09.ONF.E1-E10.
- 15  
16  
17 7 18. Benzein E, Norberg A, Saveman BI. The meaning of the lived experience of hope in  
18  
19 8 patients with cancer in palliative home care. *Palliat Med* 2001; 15:117–126.
- 20  
21  
22 9 19. Sandelowski M. Focus on research methods: Whatever happened to qualitative  
23  
24 10 description? *Res Nurs Health* 2000; 23, 334-340.
- 25  
26  
27 11 20. Elo S, Kyngas H. The qualitative content analysis process. *J Adv Nurs* 2007; 6, 107–115.
- 28  
29  
30 12 21. Tong A, Sainsbury P, Craig J. Consolidated criteria for reporting qualitative research  
31  
32 13 (COREQ): a 32-item checklist for interviews and focus groups. *Int J Qual Health Care*  
33  
34 14 2007;19(6):349-357.
- 35  
36  
37 15 22. Von Ah D. Cognitive changes associated with cancer and cancer treatment: State of the  
38  
39 16 science. *Clin J Oncol Nurs* 2015; 19, 47–56. doi:10.1188/15.CJON.19-01AP.
- 40  
41  
42 17 23. Cheung YT, Shwe M, Tan YP, Fan G, Ng R, Chan A. Cognitive changes in multiethnic  
43  
44 18 Asian breast cancer patients: a focus group study. *Ann Oncol* 2012; 23(10):2547–2552.  
45  
46 19 doi: 10.1093/annonc/mds029.
- 47  
48  
49 20 24. Hart RP, Wade JB, Martelli MF. Cognitive impairment in patients with chronic pain: The  
50  
51 21 significance of stress. *Curr Pain Headache Rep* 2003; 7(2), 116–126.
- 52  
53  
54 22 25. Myers JS. Cancer- and chemotherapy-related cognitive changes: the patient experience.  
55  
56 23 *Semin Oncol Nurs* 2013;29(4):300-7. doi: 10.1016/j.soncn.2013.08.010.

- 1  
2  
3 1 26. Zeng YC. E-mail interviewing Chinese hospital nurses' interpretations of work-related  
4  
5 2 stress. *Asian J Nurs* 2008; 11 (2): 72-79.  
6  
7  
8 3 27. Munir F, Kalawsky K, Lawrence C, Yarker J, Haslam C, Ahmed S. Cognitive  
9  
10 4 intervention for breast cancer patients undergoing adjuvant chemotherapy: a needs  
11  
12 5 analysis. *Cancer Nurs* 2011; 34(5):385–392. doi:10.1097/NCC.0b013e31820254f3.  
13  
14  
15 6 28. Becker H, Henneghan A, Mikan SQ. When do I get my brain back? Breast cancer  
16  
17 7 survivors' experiences of cognitive problems. *Clin J Oncol Nurs* 2015; 19(2):180-4. doi:  
18  
19 8 10.1188/15.CJON.180-184.  
20  
21  
22 9 29. Duijts SF, van Egmond MP, Spelten E, van Muijen P, Anema JR, van der Beek AJ.  
23  
24 10 Physical and psychosocial problems in cancer survivors beyond return to work: A  
25  
26 11 systematic review. *Psychooncology* 2014; 23: 481–492. doi: 10.1002/pon.3467.  
27  
28  
29 12 30. Zeng YC, Cheng ASK, Chan CCH. Meta-analysis of the effects of neuropsychological  
30  
31 13 interventions on cognitive function in non-central nervous system cancer survivors.  
32  
33 14 *Integr Cancer Ther* 2016; 1-11. doi: 10.1177/1534735416638737.  
34  
35  
36 15 31. Treanor CJ, McMenamin UC, O'Neill RF, Cardwell CR, Clarke MJ, Cantwell M,  
37  
38 16 Donnelly M. Non-pharmacological interventions for cognitive impairment due to  
39  
40 17 systemic cancer treatment. *Cochrane Database of Systematic Reviews* 2016, Issue 8. Art.  
41  
42 18 No.: CD011325. DOI: 10.1002/14651858.CD011325.pub2.  
43  
44  
45  
46 19  
47  
48  
49  
50  
51  
52  
53  
54  
55  
56  
57  
58  
59  
60

1 **Table 1** Demographic and clinical characteristics of participants with cognitive impairment

| Variables                                                          | Mean (SD)            | N=20, n (%) |
|--------------------------------------------------------------------|----------------------|-------------|
| <b>Age (years) (range)</b>                                         | 46.40 (9.80) (19-57) |             |
| <b>Education levels</b>                                            |                      |             |
| Primary school or below                                            |                      | 11 (55.0)   |
| College                                                            |                      | 6 (30.0)    |
| University or above                                                |                      | 3 (15.0)    |
| <b>Employment status</b>                                           |                      |             |
| Employed but on medical leave                                      |                      | 10 (50.0)   |
| Unemployed or retired                                              |                      | 10 (50.0)   |
| <b>Marital status</b>                                              |                      |             |
| Married                                                            |                      | 19 (95.0)   |
| Divorced                                                           |                      | 1 (5.0)     |
| <b>Disease stage</b>                                               |                      |             |
| Stage IA                                                           |                      | 7 (35.0)    |
| Stage IB-IIA                                                       |                      | 11 (55.0)   |
| Stage IIB-IVA                                                      |                      | 2 (10.0)    |
| <b>Types of treatment</b>                                          |                      |             |
| Surgery                                                            |                      | 5 (25.0)    |
| Surgery + chemotherapy                                             |                      | 5 (25.0)    |
| Surgery + radiation therapy                                        |                      | 2 (10.0)    |
| Surgery+radiation+chemotherapy                                     |                      | 6 (30.0)    |
| Radiation or chemotherapy                                          |                      | 2 (10.0)    |
| <b>Time since completion of primary treatment (months) (range)</b> | 1.70 (1.03) (1-5)    |             |

2

**Table 2** Major categories from the qualitative content analysis (N=31)

| Categories                                                            | n (%)     | Illustrative quotes from participants                                                                                                                                                                                                  |
|-----------------------------------------------------------------------|-----------|----------------------------------------------------------------------------------------------------------------------------------------------------------------------------------------------------------------------------------------|
| <b>Cognitive complaints</b>                                           |           |                                                                                                                                                                                                                                        |
| Lost concentration                                                    | 17(54.8)  | <i>It's difficult to focus on a conversation or when reading newspapers or books. My biggest problem is lack of concentration</i>                                                                                                      |
| Easily forgetting things or information told by others                | 15 (48.4) | <i>My memory changed a lot after chemotherapy; when I meet my friend on the street, I can't even remember her name. Sometimes, nurses tell me information about the illness, and I can't even remember what they have just told me</i> |
| Feeling it's hard to understand new things                            | 7 (22.6)  | <i>When I was reading some books, I saw the words, but I could not make sense of the words, even when I read the same sentence several times.</i>                                                                                      |
| Difficulties in finding right word in general conversation            | 4 (12.9)  | <i>When I speak with someone in general conversation, it's hard for me to find the right words</i>                                                                                                                                     |
| Slowing down in working efficiency, compared with how they used to be | 2 (6.5)   | <i>I was used to being well organised in my work and daily life, but now it's hard to get back all those abilities, and work has slowed down a lot</i>                                                                                 |
| <b>Perceived causing factors</b>                                      |           |                                                                                                                                                                                                                                        |
| Relating to chemotherapy                                              | 15 (48.4) | <i>Even during chemotherapy, I found that my memory changed a lot. Now I have completed the whole cycle of chemotherapy, and more and more memory impairment has appeared</i>                                                          |
| Side effects of cancer and its treatment                              | 12 (38.7) | <i>I believe that a lot of physical examinations, such as CT at the time of diagnosis, the use of analgesics, and the surgery procedure are all related to my cognitive problems</i>                                                   |
| Aging                                                                 | 8 (25.8)  | <i>Maybe due to my age, my memory is worse and I've started forgetting things quickly</i>                                                                                                                                              |
| Psychosocial issues                                                   | 3 (9.6)   | <i>Having to deal with too many sources of stress, such as the financial issues related to medical treatment</i>                                                                                                                       |
| Relating to immune function                                           | 2 (6.5)   | <i>After I got this disease and received this series of cancer treatments, my immune</i>                                                                                                                                               |

*function was destroyed, so my memory problems are partly due to this*

### **Coping strategies**

|                                                                               |           |                                                                                                                                                                                                                                                     |
|-------------------------------------------------------------------------------|-----------|-----------------------------------------------------------------------------------------------------------------------------------------------------------------------------------------------------------------------------------------------------|
| By writing memos                                                              | 15 (48.4) | <i>Writing down important things, use of diaries or phone reminders to organise daily tasks</i>                                                                                                                                                     |
| Self-adjustment and relaxation techniques                                     | 14 (45.2) | <i>Asking myself to focus on one task at a time. When disturbed by other things or people, I'll adjust myself and refocus on what I was doing. By reading, or listening to music for focus</i>                                                      |
| Doing nothing                                                                 | 6 (19.3)  | <i>Now I can do nothing for this problem (cognitive impairment), as this may be due to my age; with older age, cognitive decline appears naturally. Other patients believe these cognitive problems are reversible and may get better gradually</i> |
| Environment organisation                                                      | 2 (6.5)   | <i>To keep important personal belongs such as keys, eyeglasses, mobile phone in a fixed place</i>                                                                                                                                                   |
| TCM such as acupuncture                                                       | 1 (3.2)   | <i>Doctors told me there were no effective drug therapies for this problem, so I tried acupuncture</i>                                                                                                                                              |
| <b>Supportive care needs from health care providers</b>                       |           |                                                                                                                                                                                                                                                     |
| Providing common symptoms of cognitive impairment and its effective therapies | 11 (35.5) | <i>It's great for doctors and nurses to tell me common signs or symptoms of cognitive impairment, and provide intervention therapies to treat these problems</i>                                                                                    |
| Providing counselling services to family members                              | 8 (25.8)  | <i>It's hard for me to remember so much information. Health care providers should provide educational information and more counselling services to my family members</i>                                                                            |
| Need information about possible rehabilitation service                        | 7 (22.6)  | <i>After hospital discharge, where should I seek further rehabilitation service for cognitive problems, or can these problems recover gradually</i>                                                                                                 |
| Offering peer support networks                                                | 2 (6.5)   | <i>At the time of diagnosis and during cancer treatment, I felt so worried. I need to connect with women who have had a similar experience, in order to share coping</i>                                                                            |



strategies

**Impacts on**

|                            |           |                                                                                                                                                                                                                                                                                                                                       |
|----------------------------|-----------|---------------------------------------------------------------------------------------------------------------------------------------------------------------------------------------------------------------------------------------------------------------------------------------------------------------------------------------|
| Daily lives                | 20 (64.5) | <i>Sometimes, when people talk with me, I immediately forget what they were talking about, or when I'm doing things and people interrupt me, I'll forget what I want to do</i>                                                                                                                                                        |
| Quality of life            | 9 (29.0)  | <i>This disease and its treatment have severely impacted all aspects of my life and left me feeling overwhelmed. Now I have poor memory, a slowed thinking process, and a large financial burden as a result of the medical costs, causing tension in my family relationship</i>                                                      |
| Psychological health       | 5 (16.1)  | <i>Sometimes my brain becomes blank, and it seems my memory could not come back, so I felt so frightened and scared</i>                                                                                                                                                                                                               |
| Work capability            | 3 (9.6)   | <i>I have to leave my job, due to my body image now, during and after chemotherapy I lost a lot of hair, and I can't work for very long, I can only work for a short period of time, then I have to rest</i>                                                                                                                          |
| Physical health conditions | 2 (6.5)   | <i>Cognitive function changes were not obvious, but my health condition was a lot worse; before the cancer diagnosis, my health was OK. But now my sleep is not good, my immune system is much weaker, and due to the loss of physical energy I can't work too long and need to take a break after working for just a short while</i> |

---

Abbreviation: TCM, traditional Chinese medicine

1  
2  
3 **Fig. 1** A preliminary cognition model among cervical cancer survivors after cancer treatment  
4  
5  
6  
7  
8  
9  
10  
11  
12  
13  
14  
15  
16  
17  
18  
19  
20  
21  
22  
23  
24  
25  
26  
27  
28  
29  
30  
31  
32  
33  
34  
35  
36  
37  
38  
39  
40  
41  
42  
43  
44  
45  
46  
47  
48  
49  
50  
51  
52  
53  
54  
55  
56  
57  
58  
59  
60

For peer review only

## Appendix 1 Consolidated criteria for reporting qualitative studies (COREQ) checklist

| COREQ items                                 | Descriptions                                                                                                                                   |
|---------------------------------------------|------------------------------------------------------------------------------------------------------------------------------------------------|
| Domain 1: Research team and reflexivity     |                                                                                                                                                |
| 1. Interviewer/facilitator                  | The third author conducted the interview                                                                                                       |
| 2. Credentials                              | The researcher is nursing professor and holds Master degree of Nursing                                                                         |
| 3. Occupation                               | Clinical nursing researcher at the time of the study                                                                                           |
| 4. Gender                                   | Female                                                                                                                                         |
| 5. Experience and training                  | The researcher works for clinical researcher for more than 5 years with qualitative research training                                          |
| Relationship with participants              |                                                                                                                                                |
| 6. Relationship established                 | Working relationship was established prior to study commencement                                                                               |
| 7. Participant knowledge of the interviewer | Participants know about the researcher for doing the research                                                                                  |
| 8. Interviewer characteristics              | Described at page 7 from line 1 to line 6 in the manuscript.                                                                                   |
| Domain 2: study design                      |                                                                                                                                                |
| Theoretical framework                       |                                                                                                                                                |
| 9. Methodological orientation and Theory    | Methodological orientation underpinning the study was content analysis and was guided by a conceptual model by Myers (2009) (page 6, line 1-9) |
| Participant selection                       |                                                                                                                                                |
| 10. Sampling                                | Purposive sampling described at page 6, line 12-13.                                                                                            |
| 11. Method of approach                      | Participants approached by face-to-face                                                                                                        |
| 12. Sample size                             | 31 participants in this study                                                                                                                  |
| 13. Non-participation                       | 19 participants refused, reasons described at page 8 line 22, to page 9 line 1.                                                                |
| Setting                                     |                                                                                                                                                |
| 14. Setting of data collection              | Hospital's meeting room (page 7, line3)                                                                                                        |
| 15. Presence of non-participants            | Nobody else present besides the participants and researchers (page 8, line 5-6)                                                                |
| 16. Description of sample                   | Table 1.                                                                                                                                       |
| Data collection                             |                                                                                                                                                |
| 17. Interview guide                         | Consisting of 7 open-ended questions and was pilot tested in a participants (page 7, line 8-17)                                                |
| 18. Repeat interviews                       | None                                                                                                                                           |
| 19. Audio/visual recording                  | N/A. as this study collected data by written narratives                                                                                        |
| 20. Field notes                             | Yes, at page 7, line 5-6                                                                                                                       |
| 21. Duration                                | 30-45 minutes (page 7, line 17)                                                                                                                |
| 22. Data saturation                         | Yes, described at page 7, line 18-20                                                                                                           |
| 23. Transcripts returned                    | Transcripts were returned to three participants for comments or correction (page 8, line 14-16)                                                |

1  
2  
3 Domain 3: analysis and findings

## 4 Data analysis

5 24. Number of data coders

Twenty copies of data coded

6 25. Description of the coding tree

None.

7 26. Derivation of themes

Themes were derived from the data (Table2)

8 27. Software

Nvivo 11 was used to manage the data (page 8, line  
9 4)

10 28. Participant checking

Three participants checked the final transcript of  
11 this study (page 8, line 14-16)

## 12 Reporting

13 29. Quotations presented

Table 2.

14 30. Data and findings consistent

There was consistency between the data presented  
15 and the findings.

16 31. Clarity of major themes

Major themes clearly presented in the findings  
17 (Table 2)

18 32. Clarity of minor themes

Any diverse cases was resolved during the stage of  
19 data analysis.  
20  
21  
22  
23  
24  
25  
26  
27  
28  
29  
30  
31  
32  
33  
34  
35  
36  
37  
38  
39  
40  
41  
42  
43  
44  
45  
46  
47  
48  
49  
50  
51  
52  
53  
54  
55  
56  
57  
58  
59  
60

# BMJ Open

## Cognitive complaints and supportive care needs in Chinese cervical cancer survivors: a qualitative study

|                                 |                                                                                                                                                                                                                                                                                                                                                                                                                        |
|---------------------------------|------------------------------------------------------------------------------------------------------------------------------------------------------------------------------------------------------------------------------------------------------------------------------------------------------------------------------------------------------------------------------------------------------------------------|
| Journal:                        | <i>BMJ Open</i>                                                                                                                                                                                                                                                                                                                                                                                                        |
| Manuscript ID                   | bmjopen-2016-014078.R2                                                                                                                                                                                                                                                                                                                                                                                                 |
| Article Type:                   | Research                                                                                                                                                                                                                                                                                                                                                                                                               |
| Date Submitted by the Author:   | 14-Jan-2017                                                                                                                                                                                                                                                                                                                                                                                                            |
| Complete List of Authors:       | Zeng, Y; The Hong Kong Polytechnic University, Department of Rehabilitatoin Sciences; The Third Affiliated Hospital of Guangzhou Medical University, Research Institute of Gynecology and Obstetrics<br>Cheng, Andy; The Hong Kong Polytechnic University<br>Liu, Xiangyu; Hunan Cancer Hospital, Department of Nursing<br>Chan, Chetwyn ; The Hong Kong Polytechnic University, Department of Rehabilitatoin Sciences |
| <b>Primary Subject Heading</b>: | Qualitative research                                                                                                                                                                                                                                                                                                                                                                                                   |
| Secondary Subject Heading:      | Oncology, Qualitative research                                                                                                                                                                                                                                                                                                                                                                                         |
| Keywords:                       | Cervical cancer, Survivors, Cognitive complaints, Supportive care needs                                                                                                                                                                                                                                                                                                                                                |
|                                 |                                                                                                                                                                                                                                                                                                                                                                                                                        |

SCHOLARONE™  
Manuscripts

1  
2  
3 **Title: Cognitive complaints and supportive care needs in Chinese cervical cancer survivors:**  
4  
5 **a qualitative study**  
6  
7  
8

9  
10 Yingchun Zeng<sup>1,2</sup>, MPhil, PhD Candidate; Andy SK Cheng<sup>1</sup>, PhD; Xiangyu Liu<sup>3</sup>, Chetwyn  
11  
12 CH Chan<sup>1</sup>, PhD  
13  
14

15  
16  
17 **Author Affiliations:**  
18

19  
20 <sup>1</sup>Department of Rehabilitation Sciences, The Hong Kong Polytechnic University, Hong Kong,  
21  
22 China  
23

24  
25 <sup>2</sup>Research Institute of Gynaecology and Obstetrics, The Third Affiliated Hospital of  
26  
27 Guangzhou Medical University, Guangzhou, China  
28

29  
30 <sup>3</sup>Department of Nursing, Hunan Cancer Hospital, Changsha, China  
31  
32

33  
34  
35  
36 **Correspondence:** Dr Andy Cheng, Department of Rehabilitation Sciences, The Hong Kong  
37  
38 Polytechnic University, Hung Hom, Hong Kong, China (Email: andy.cheng@polyu.edu.hk).  
39  
40  
41  
42  
43  
44  
45  
46  
47  
48  
49  
50  
51  
52  
53  
54  
55  
56  
57  
58  
59  
60

## Abstract

**Objectives:** This study aims to explore perceived cognitive complaints and relevant supportive care needs in Chinese cervical cancer survivors after primary cancer treatment.

**Design:** This study utilised a qualitative research design. A semi-structured interview was used to probe cervical cancer patients' perceived cognitive complaints and supportive care needs.

**Setting:** This study was conducted in a secondary cancer care centre located in South China.

**Participants:** 31 women with cervical cancer after primary cancer treatment, aged 18-60 years old, were purposively selected using non-random sampling procedures.

**Results:** A total of 31 cervical cancer survivors joined this study. Of that total, 20 women (64.5%) reported cognitive complaints after cancer treatment. The most common complaint was loss of concentration (n=17, 85.0%). Perceived contributing factors to these cognitive complaints included chemotherapy (n=15, 75.0%), and aging (n=8, 40.0%). These cognitive problems most commonly impacted their daily living (n=20, 100%). Common supportive care needs include symptom management strategies (n=11, 55.0%), and counselling services (n=8, 40.0%).

**Conclusion:** This study adds new insights into the growing body of research on cognitive complaints by cancer survivors, in particular Chinese cervical cancer survivors. Improved understanding of cognitive complaints would subsequently facilitate the development of relevant therapeutic interventions for prevention, and the provision of supportive care services, such as educational and counselling services, to reduce cognitive impairment in women with cervical cancer.

### Study strengths and limitations

- This qualitative study used written qualitative responses as means of data collection, so this method is more cost-effective and less time-consuming due to no requiring transcription.
- Additional strength of this study is that written qualitative responses might overcome the barrier of dialects, as Chinese people even within the same province typically speak many different Chinese dialects, so the written form is understandable across these dialect groups.
- This preliminary study only recruited study participants at a single medical centre, which could limit the transferability of study findings.
- This study included study participants who had completed primary cancer treatment in a short period of time; longitudinal research should be conducted to identify the trajectory of cognitive complaints over the cancer care continuum.

**Keywords** Cervical cancer. Survivors. Cognitive complaints. Supportive care needs.



## Introduction

Cervical cancer is the second most common cancer, followed by breast cancer, among women in China.<sup>1</sup> Due to medical advancements in early detection and the possibility of curative cancer treatment,<sup>2</sup> the five-year relative survival rate of cervical cancer in mainland China is up to 69% for all stages.<sup>1</sup> As more cervical cancer survivors are living longer after curative treatment, late effects of cancer treatment are becoming increasingly common.<sup>3</sup> One such long-term and late effect is neurocognitive, which has emerged as a significant problem affecting cervical cancer survivors.<sup>4,5</sup>

Cognitive complaints often refer to cognitive impairment or cancer-related cognitive impairment.<sup>6,7</sup> Other studies have described this as chemotherapy-related cognitive dysfunction, colloquially named ‘chemo brain’ or ‘chemo fog’.<sup>8,9</sup> Cognitive complaints have the potential to significantly impact both social and occupational functioning, interfering with the ability to carry out normal daily activities, all of which in turn contributes to lower quality of life (QOL) in cancer survivors.<sup>4,6,10</sup> Cognitive complaints have been reported in approximately 40% of patients prior to any cancer treatment, and as many as 75% of patients indicate some degree of cognitive impairment during the period of active cancer treatment. Finally, cognitive complaints are still present in up to 60% of long-term cancer survivors.<sup>6</sup> In a study conducted in mainland China, female cancer survivors with an average of 2.79 years post- primary treatment reported higher levels of cognitive limitations, significantly reducing their work productivity and global QOL.<sup>11</sup>

There are quantitative research approaches employed to explore cognitive complaints and related supportive care issues among cancer survivors,<sup>4,12</sup> and these researchers have proposed that quantitative cognitive measures are more objective and reliable than qualitative exploration of

1  
2  
3 cognitive problems in cancer survivors.<sup>13,14</sup> However, other researchers have argued there are  
4  
5 inherent difficulties with a quantitative approach, in terms of fully appreciating cognitive  
6  
7 complaints by cancer patients.<sup>4,15</sup> Qualitative research studies would enable us to identify the  
8  
9 presence of cognitive symptoms that quantitative approaches cannot detect, either by self-  
10  
11 reported cognitive measures or neurocognitive tests.<sup>15</sup> In addition, qualitative in-depth interviews  
12  
13 could provide information about how cognitive impairment impacts cancer patients' QOL, and  
14  
15 could allow researchers to obtain rich information about numerous coping strategies to  
16  
17 ameliorate cognitive dysfunction symptoms, as well as develop intervention strategies.<sup>15</sup>  
18  
19  
20  
21  
22

23 Therefore, there is a need for a qualitative study to explore perceived cognitive complaints and  
24  
25 relevant supportive care needs in cervical cancer survivors after primary cancer treatment. A  
26  
27 clear understanding of cognitive complaints experienced by cervical cancer survivors, through  
28  
29 qualitative in-depth interviews, could aid health care providers in developing targeted  
30  
31 interventions, as well as in providing relevant supportive care services for alleviating the extent  
32  
33 and impact of cognitive complaints in cancer survivors.<sup>16</sup>  
34  
35  
36  
37  
38  
39  
40

## 41 **Methods**

### 42 *Design*

43  
44  
45 This study utilised a qualitative research design. A semi-structured interview was used to probe  
46  
47 cervical cancer patients' perceived cognitive complaints and supportive care needs.  
48  
49  
50  
51  
52  
53  
54  
55  
56  
57  
58  
59  
60

### ***Study framework***

This study was guided by the conceptual model of chemotherapy-related changes in cognitive function proposed by Myers.<sup>17</sup> This model consists of three key components: antecedents (cancer diagnosis and cancer treatment), mediators (physiologic, psychosocial and situational factors), and consequences (quality of life and functional ability).<sup>17</sup> While this model is named chemotherapy-related cognitive impairment, recent evidence indicates that cancer itself is also related to cognitive impairment.<sup>6</sup> As suggested by Myers, when researchers learn more about the physiological and psychological aspects of cognitive impairment, this model will require refining.<sup>17</sup>

### ***Study sample***

All study participants were recruited from the Gynaecological Oncology Unit in a cancer hospital. This study obtained ethical approval from the hospital's ethics committee. A purposive sampling was drawn to recruit eligible informants. Inclusion criteria were: women who were at least 18 years old, with a primary diagnosis of cervical cancer, who had completed their primary cancer treatment of surgery, radiation therapy or chemotherapy. Exclusion criteria included potential psychiatric disorders, previous cancer history, or traumatic brain injury.

### ***Study procedure and qualitative interviews***

After obtaining written consent, eligible participants were invited to participate in a semi-structured interview, and complete a socio-demographic sheet. This sheet was used to collect information on demographic and clinical characteristics, including age, education level, marital status, stage of tumour, type of cancer treatment received, and time since completion of primary cancer treatment. Qualitative interviews were guided by a narrative epistemology so as to

1  
2  
3 facilitate informants in providing narrative accounts of their perceived experience.<sup>18</sup> The  
4 interviewer was an experienced research nurse who was not the staff nurse in the research setting  
5 of the Gynaecological Oncology Unit, and the data collection method was by written narrative,  
6 so that the interviewer's beliefs, biases or preconceptions would have no influence on the  
7 direction of the interviews. The interviewer only remained in the meeting room to take field  
8 notes, in order to obtain any emerging thoughts to guide data analysis.  
9  
10  
11  
12  
13  
14  
15  
16  
17

18 The interviews were conducted face-to-face at the in-patient ward's meeting room. All  
19 interviews utilised an interview guide composed of the following open-ended questions: 1)  
20 Compared to before your cancer diagnosis, tell us about the overall change in your cognitive  
21 abilities? For example, perceptions of understanding what people say to you, thinking of the right  
22 word when responding to others, feeling confident in completing a task or taking on new tasks? 2)  
23 What do you think the common contributing factors to any cognitive changes might be? 3) How  
24 do these perceived cognitive changes impact your daily life or your ability to work? 4) How do  
25 you deal with these changes? In other words, what types of coping strategies do you use as a  
26 result of any cognitive changes you might be experiencing? 5) What types of supportive care  
27 services would you like to seek from health care providers to help you cope with any cognitive  
28 complaints? Each interview lasted 30 to 45 minutes, and was recorded by a digital recorder and  
29 transcribed verbatim. Data saturation was achieved much earlier than the final sample size of 31  
30 patients with cervical cancer, as data collection and analysis were performed simultaneously in  
31 an iterative process.<sup>19</sup>  
32  
33  
34  
35  
36  
37  
38  
39  
40  
41  
42  
43  
44  
45  
46  
47  
48  
49  
50  
51  
52  
53  
54  
55  
56  
57  
58  
59  
60

## Data analysis

Qualitative interview data were transcribed to produce a verbatim transcript. During the entire data analysis process, the researcher consciously separated herself from those biases, in order to be open to the information shared by study participants. NVivo 11 qualitative software (<http://www.qsrinternational.com/nvivo-product/nvivo11-for-windows>) was applied to organise and code the verbatim transcript. Qualitative content analysis was used to prepare, organise, and report the data.<sup>20</sup> A three-step content analysis process was followed: "1) *The verbatim transcript was organised into meaning units (such as words, phrases, sentences, or paragraphs that conveyed similar content deemed important to understanding the patients' experiences).* 2) *The meaning units were coded and categorised.* 3) *The abstraction process was guided by Myers's conceptual model and continued until primary themes were identified.*<sup>20</sup>

Two research members conducted content analysis independently. For any disagreement with the interpretation of clusters or categories, a third research member was involved in the discussion process, in order to establish consensus. To ensure the study findings were accurately reflecting informants' truly perceived experience of cognitive changes. Three women were invited to check the final verbatim transcript for the purpose of collecting participants' feedback and validation. The consolidated criteria for reporting qualitative studies (COREQ) checklist was applied to guide this study and ensure study rigour (Appendix 1).<sup>21</sup>

## Results

A total of 50 patients with cervical cancer were approached, with 31 agreeing to participate in this written narrative interview. The women who did not agree to join this study had no interest

1  
2  
3 in participating in any research. Their characteristics in terms of age, cancer stage and treatment  
4 types were comparable to the patients who completed semi-structured interviews. Of the 31  
5 participants, 20 women (64.5%) reported cognitive complaints after cancer treatment. The socio-  
6 demographic and clinical characteristics of women with cognitive impairment and without  
7 perceived cognitive impairment are listed in Table 1. From Table 1, the demographic/clinical  
8 characteristics of women with and without perceived cognitive impairment were comparable.  
9

10  
11  
12 Major categories that emerged from the data included cognitive complaints, perceived  
13 contributing factors, impacts of cognitive problems on women's daily lives, health outcomes and  
14 work capabilities, coping strategies and supportive care needs from health care providers are  
15 shown in Table 2. The most common complaint was loss of concentration (n=17, 85.0%),  
16 followed by memory problems (n=15, 75.0%). Other common cognitive complaints included  
17 difficulties in learning new things, language issues (finding the right word to respond in  
18 everyday conversations), and a slowed rate of information processing.  
19

20  
21  
22 The participants identified several factors that they believed were contributing to their cognitive  
23 complaints, including chemotherapy (n=15, 75.0%), side effects of cancer and other treatment,  
24 such as surgery or radiation therapy (n=12, 60.0%), and aging (n=8, 40.0%). These cognitive  
25 complaints had negative impacts on their daily lives, sleep and rest (n=20, 100%). Two  
26 participants indicated their cognitive function had seen negligible change, but their physical  
27 health had deteriorated significantly after their cervical cancer diagnosis. While ten women who  
28 were on medical leave at the time of data collection, two women indicated they were planning to  
29 leave their jobs due to loss of concentration and slowed information processing capacity.  
30  
31  
32  
33  
34  
35  
36  
37  
38  
39  
40  
41  
42  
43  
44  
45  
46  
47  
48  
49  
50  
51  
52  
53  
54  
55  
56  
57  
58  
59  
60

1  
2  
3 As shown in Table 2, the most commonly used coping strategies were memo writing (n=15,  
4 75.0%), and self-adjustment (n=14, 70.0%). Other coping strategies include “doing nothing” and  
5  
6 organisation of their environment. In addition, one woman sought acupuncture as an alternative  
7  
8 therapy for her cognitive problems, as she had been told by her physician that there was no  
9  
10 effective medication for cognitive impairment thus far. Chinese cervical cancer survivors  
11  
12 describe a variety of supportive care needs, such as the need for education on common signs and  
13  
14 symptoms of cognitive impairment and effective treatment therapies (n=11, 55.0%), providing  
15  
16 counselling service to family members (n=8, 40.0%), and information on further rehabilitation  
17  
18 services (n=7, 35.0%). Two women expressed the need for peer support, and suggested that  
19  
20 health care providers could organise a peer support service for patients starting from the  
21  
22 diagnosis stage onward. Several patients indicated that their health care providers had never  
23  
24 mentioned cognitive impairment issues, and only mentioned this when patients asked about  
25  
26 cognitive problems that appeared during cancer treatment.  
27  
28  
29  
30  
31  
32

33  
34  
35 Based on the conceptual model of chemotherapy-related changes in cognitive function proposed  
36  
37 by Myers (2009), and in combination with a synthesis of these qualitative findings, a refinement  
38  
39 cognition model among cervical cancer survivors is illustrated in Figure 1. Cognitive complaints  
40  
41 are multifactorial in nature, and contributing factors include demographic characteristics,  
42  
43 biological factors, psychological distress, disease stage and cancer therapies.  
44  
45  
46  
47  
48  
49  
50

## 51 **Discussion**

52  
53  
54 This is one of the first published studies exploring cognitive complaints in Chinese cervical  
55  
56 cancer survivors, while there is accumulating evidence documenting cognitive impairment issues  
57  
58  
59  
60

1  
2  
3 among cancer survivors, mainly dominated by breast cancer survivors.<sup>22</sup> The prevalence of  
4 cognitive complaints among Chinese cervical cancer survivors was 64.5%, which is consistent  
5 with previous research.<sup>6</sup> As this study was a preliminary study and adopted a small and non-  
6 random sample, so epidemiological studies are needed to further quantify the prevalence, impact  
7 and extent of cognitive complaints in this study population.<sup>23</sup>  
8  
9

10  
11  
12  
13  
14  
15  
16 Concurring with previous research evidence, chemotherapy and the side effects of cancer are the  
17 most common factors associated with cognitive complaints.<sup>4,7</sup> This study identified that cervical  
18 cancer survivors perceive aging as a likely contributing factor in cognitive impairment. These  
19 participants took “aging as a normal process of cognitive decline,” and viewed cognitive  
20 impairment as a process that could not be changed. Consistent with previous studies,<sup>17,24</sup>  
21 participants in this study also reported that symptoms of worry, fatigue and pain seem to be  
22 related to cognitive impairment.  
23  
24  
25  
26  
27  
28  
29  
30  
31

32  
33 The patient experience of cancer-related cognitive impairment may be the commonalities of the  
34 phenomenon across tumour types,<sup>25</sup> as this study did not find unique cognitive deficits in women  
35 with cervical cancer. Yet this study did identify some unique cultural issues for Chinese women  
36 in terms of coping strategies for cognitive impairment. Some women did nothing to try to cope  
37 with their cognitive complaints. ‘Doing nothing’ as a common coping strategy for cognitive  
38 complaints could be related to the Chinese Taoist philosophy: “Accepting the fact that a situation  
39 cannot be changed, and telling oneself that one should do little, as things will be all right at the  
40 end of the day”.<sup>26</sup> Hence, coping strategies of doing nothing and self-adjustment could help these  
41 survivors maintain a sense of calm when facing difficulties that cannot be changed.  
42  
43  
44  
45  
46  
47  
48  
49  
50  
51  
52  
53  
54  
55  
56  
57  
58  
59  
60



1  
2  
3 As in previous studies,<sup>4,6,7</sup> findings from this study also revealed that cognitive complaints had a  
4 variety of consequences that impacted daily living, QOL, physical and psychological health, and  
5 work capabilities. While research into the relationship between cognitive functioning and work  
6 ability is still in its infancy,<sup>27</sup> returning to work is a critical milestone for many survivors, since  
7 work plays a key role in one's psychological, economic, and social wellbeing.<sup>28</sup> If cancer  
8 survivors were able to obtain individualised support and work-related adjustments from their  
9 employer, they would be more likely to continue working.<sup>23</sup> Hence, cognitive complaints in  
10 cancer survivors generate numerous supportive care requirements, not only in the workplace, but  
11 also from health care providers.  
12  
13  
14  
15  
16  
17  
18  
19  
20  
21  
22  
23

24  
25 Common supportive care needs from health care providers include providing information about  
26 common signs of cognitive symptoms and management strategies, effective treatment therapies  
27 and possible rehabilitation services, in order to manage cognitive problems. Although many  
28 health care providers may gloss over the issue of patient cognitive complaints, believing they  
29 have no curative treatment to offer patients,<sup>29</sup> findings from a meta-analysis indicate that  
30 neuropsychological interventions (cognitive rehabilitation, cognitive training and  
31 neuromodulation strategies) can improve cognitive function in cancer survivors.<sup>30</sup> In particular, a  
32 recent Cochrane review indicates that cognitive training may be effective in improving patients'  
33 cognitive function, as well as quality of life.<sup>31</sup> Additionally, behavioural intervention strategies  
34 (increasing physical activities and fostering supportive social relationships) could be helpful in  
35 improving cognitive function among cancer survivors.<sup>12</sup>  
36  
37  
38  
39  
40  
41  
42  
43  
44  
45  
46  
47  
48  
49  
50  
51

52 By a synthesis of these study findings, a preliminary cognition model for cervical cancer  
53 survivors after cancer treatment was established, to provide a theoretical underpinning for the  
54 perception of cognitive complaints, contributing factors, mediating factors, and the consequences  
55  
56  
57  
58  
59  
60

1  
2  
3 of cognitive impairment in this study population. This model may be able to inform and  
4  
5 stimulate further intervention studies. Certainly, this preliminary cognition model of cervical  
6  
7 cancer survivors after cancer treatment can be continuously refined by further empirical research  
8  
9 investigations. Overall, this model illustrates coping strategies at a personal level by self-  
10  
11 adjustment or by doing nothing; and supportive care services, such as educational and  
12  
13 counselling services for family members by health care providers could mitigate the extent of the  
14  
15 consequences of cognitive impairment. In addition, participants felt a great need for support,  
16  
17 such as peer support, from diagnosis onwards, as well as for information on available  
18  
19 rehabilitation services and counselling, to modulate the degree of cognitive complaints.  
20  
21 Consequently, cognitive complaints exert negative effects on their daily living, QOL, work  
22  
23 capability, and physical and psychological health.  
24  
25  
26  
27  
28  
29

### 30 **Limitations and implications for future research**

31  
32  
33 There are two limitations in this study. Firstly, this preliminary study only recruited study  
34  
35 participants at a single medical centre, and the sample size could not be representative of this  
36  
37 population in general, although this study primarily offers significant insights into perceived  
38  
39 cognitive complaints, contributing factors and consequences of cognitive impairment in cervical  
40  
41 cancer survivors. Secondly, this study utilised a cross-sectional design and included study  
42  
43 participants on the completion of primary cancer treatment in a short period of time. Future  
44  
45 longitudinal research should be conducted to identify the trajectory of cognitive complaints over  
46  
47 the cancer care continuum. As suggested by Myers,<sup>25</sup> qualitative studies do provide valuable  
48  
49 information to healthcare professionals about the impact that cognitive changes have on cancer  
50  
51 patients' QOL and daily function. Understanding cancer patients' experience of cognitive  
52  
53 impairment, their coping strategies and supportive care needs could help healthcare professionals  
54  
55  
56  
57  
58  
59  
60

1  
2  
3 develop interventions to prevent, mitigate, and treat the cognitive sequelae of cancer and its  
4  
5 treatment therapies.<sup>25</sup>  
6  
7  
8  
9  
10

## 11 **Conclusion**

12  
13  
14  
15 This study adds new insights into the growing body of research on cognitive complaints by  
16  
17 cancer survivors, in particular Chinese cervical cancer survivors. Improved understanding of  
18  
19 cognitive complaints would subsequently facilitate the development of relevant therapeutic  
20  
21 interventions for prevention, and providing supportive care services, such as educational and  
22  
23 counselling services, to reduce cognitive impairment in women with cervical cancer.  
24  
25  
26  
27  
28  
29  
30  
31  
32  
33  
34  
35  
36  
37  
38  
39  
40  
41  
42  
43  
44  
45  
46  
47  
48  
49  
50  
51  
52  
53  
54  
55  
56  
57  
58  
59  
60

1  
2  
3 **Acknowledgments:** Thanks to all participants who voluntarily joined this study and generously  
4 shared their views and concerns.  
5  
6  
7

8  
9 **Contributors:** ZYC and ASKC are the main authors and designed this study and drafted this  
10 manuscript. LXY conducted interviews, LXY and ZYC analysed data independently. CCHC  
11 made a significant contribution to the manuscript revisions.  
12  
13  
14

15  
16  
17 **Funding:** None.  
18  
19

20 **Competing interests:** The authors declare no conflicts of interest.  
21  
22

23 **Ethics approval:** This study was approved by the Medical Ethics Committee of Hunan Cancer  
24 Hospital.  
25  
26  
27

28  
29 **Data sharing statement:** No additional data are available.  
30  
31  
32  
33  
34  
35  
36  
37  
38  
39  
40  
41  
42  
43  
44  
45  
46  
47  
48  
49  
50  
51  
52  
53  
54  
55  
56  
57  
58  
59  
60

## References

1. Chen W, Zheng R, Baade PD, Zhang S, Zeng H, Bray F, et al. Cancer statistics in China, 2015. *CA: Cancer J Clin* 2016; 66: 115–132. doi: 10.3322/caac.21338.
2. Lange M, Rigal O, Clarisse B, Giffard B, Sevin E, Barillet M, et al. Cognitive dysfunctions in elderly cancer patients: a new challenge for oncologists. *Cancer Treat Rev* 2014; 40: 810-817. doi: 10.1016/j.ctrv.2014.03.003.
3. Treanor C, Donnelly M. Late effects of cancer and cancer treatment- a rapid review. *J Community Supportive Oncol* 2014; 12:137-148.
4. Craig CD, Monk BJ, Farley JH, Chase DM. Cognitive impairment in gynecologic cancers: a systematic review of current approaches to diagnosis and treatment. *Support Care Cancer* 2014; 22: 279-287. doi: 10.1007/s00520-013-2029-7.
5. Faubion SS, MacLaughlin KL, Long ME, Pruthi S, Casey PM. Surveillance and Care of the Gynecologic Cancer Survivor. *J Womens Health (Larchmt)* 2015; 24: 899-906. doi: 10.1089/jwh.2014.5127.
6. Wefel JS, Kesler SR, Noll KR, Schagen SB. Clinical characteristics, pathophysiology, and management of noncentral nervous system cancer-related cognitive impairment in adults. *CA Cancer J Clin* 2015; 65: 123-138. doi: 10.3322/caac.21258.
7. Janelins MC, Kesler SR, Ahles TA, Morrow GR. Prevalence, mechanisms, and management of cancer-related cognitive impairment. *Int Rev Psychiatry* 2014; 26:102–113. doi:10.3109/09540261.2013.864260.
8. Wefel JS, Schagen SB. Chemotherapy-related cognitive dysfunction. *Curr Neurol Neurosci Rep* 2012; 12: 267–275. doi:10.1007/s11910-012-0264-9

- 1  
2  
3  
4  
5  
6  
7  
8  
9  
10  
11  
12  
13  
14  
15  
16  
17  
18  
19  
20  
21  
22  
23  
24  
25  
26  
27  
28  
29  
30  
31  
32  
33  
34  
35  
36  
37  
38  
39  
40  
41  
42  
43  
44  
45  
46  
47  
48  
49  
50  
51  
52  
53  
54  
55  
56  
57  
58  
59  
60
9. Hines S, Ramis MA, Pike S, Chang AM. The effectiveness of psychosocial interventions for cognitive dysfunction in cancer patients who have received chemotherapy: a systematic review. *Worldviews Evid Based Nurs* 2014; 11:187-193. doi: 10.1111/wvn.12042.
10. Correa DD, Hess LM. Cognitive function and quality of life in ovarian cancer. *Gynecol Oncol* 2012; 124: 404-409. doi: 10.1016/j.ygyno.2011.11.005.
11. Zeng Y, Cheng ASK, Liu X, Feuerstein M. Symptom profiles, work productivity and quality of life among Chinese female cancer survivors. *Gynecol Obstet (Sunnyvale)* 2016; 6: 357. doi:10.4172/2161-0932.1000357
12. Henneghan A. Modifiable factors and cognitive dysfunction in breast cancer survivors: a mixed-method systematic review. *Support Care Cancer* 2016; 24(1):481–497. doi: 10.1007/s00520-015-2927-y.
13. Dutta V. Chemotherapy, neurotoxicity, and cognitive changes in breast cancer. *J Cancer Res Ther* 2011; 7: 264-269. doi: 10.4103/0973-1482.87008.
14. Hess LM, Chambers SK, Hatch K, Hallum A, Janicek MF, Buscema J et al. Pilot study of the prospective identification of changes in cognitive function during chemotherapy treatment for advanced ovarian cancer. *J Support Oncol* 2010; 8: 252-258.
15. Wu LM, Tanenbaum ML, Dijkers M, Amidi A, Hall SJ, Penedo FJ et al. Cognitive and neurobehavioral symptoms in patients with nonmetastatic prostate cancer treated with androgen deprivation therapy or observation: A mixed methods study. *Soc Sci Med* 2016; 156: 80-89. doi: 10.1016/j.socscimed.

- 1  
2  
3  
4  
5  
6  
7  
8  
9  
10  
11  
12  
13  
14  
15  
16  
17  
18  
19  
20  
21  
22  
23  
24  
25  
26  
27  
28  
29  
30  
31  
32  
33  
34  
35  
36  
37  
38  
39  
40  
41  
42  
43  
44  
45  
46  
47  
48  
49  
50  
51  
52  
53  
54  
55  
56  
57  
58  
59  
60
16. Boykoff N, Moieni M, Subramanian SK. Confronting chemobrain: an in-depth look at survivors' reports of impact on work, social networks, and health care response. *J Cancer Surviv* 2009; 3(4):223–232. doi:10.1007/s11764-009-0098-x.
17. Myers JS. A comparison of the theory of unpleasant symptoms and the conceptual model of chemotherapy-related changes in cognitive function. *Oncol Nurs Forum* 2009;36(1):E1-10. doi: 10.1188/09.ONF.E1-E10.
18. Benzein E, Norberg A, Saveman BI. The meaning of the lived experience of hope in patients with cancer in palliative home care. *Palliat Med* 2001; 15:117–126.
19. Sandelowski M. Focus on research methods: Whatever happened to qualitative description? *Res Nurs Health* 2000; 23, 334-340.
20. Elo S, Kyngas H. The qualitative content analysis process. *J Adv Nurs* 2007; 6, 107–115.
21. Tong A, Sainsbury P, Craig J. Consolidated criteria for reporting qualitative research (COREQ): a 32-item checklist for interviews and focus groups. *Int J Qual Health Care* 2007;19(6):349-357.
22. Von Ah D. Cognitive changes associated with cancer and cancer treatment: State of the science. *Clin J Oncol Nurs* 2015; 19, 47–56. doi:10.1188/15.CJON.19-01AP.
23. Cheung YT, Shwe M, Tan YP, Fan G, Ng R, Chan A. Cognitive changes in multiethnic Asian breast cancer patients: a focus group study. *Ann Oncol* 2012; 23(10):2547–2552. doi: 10.1093/annonc/mds029.
24. Hart RP, Wade JB, Martelli MF. Cognitive impairment in patients with chronic pain: The significance of stress. *Curr Pain Headache Rep* 2003; 7(2), 116–126.
25. Myers JS. Cancer- and chemotherapy-related cognitive changes: the patient experience. *Semin Oncol Nurs* 2013;29(4):300-7. doi: 10.1016/j.soncn.2013.08.010.

- 1  
2  
3  
4 26. Zeng YC. E-mail interviewing Chinese hospital nurses' interpretations of work-related  
5 stress. *Asian J Nurs* 2008; 11 (2): 72-79.  
6  
7  
8 27. Munir F, Kalawsky K, Lawrence C, Yarker J, Haslam C, Ahmed S. Cognitive  
9 intervention for breast cancer patients undergoing adjuvant chemotherapy: a needs  
10 analysis. *Cancer Nurs* 2011; 34(5):385–392. doi:10.1097/NCC.0b013e31820254f3.  
11  
12  
13 28. Becker H, Henneghan A, Mikan SQ. When do I get my brain back? Breast cancer  
14 survivors' experiences of cognitive problems. *Clin J Oncol Nurs* 2015; 19(2):180-4. doi:  
15 10.1188/15.CJON.180-184.  
16  
17  
18 29. Duijts SF, van Egmond MP, Spelten E, van Muijen P, Anema JR, van der Beek AJ.  
19 Physical and psychosocial problems in cancer survivors beyond return to work: A  
20 systematic review. *Psychooncology* 2014; 23: 481–492. doi: 10.1002/pon.3467.  
21  
22  
23 30. Zeng YC, Cheng ASK, Chan CCH. Meta-analysis of the effects of neuropsychological  
24 interventions on cognitive function in non-central nervous system cancer survivors.  
25 *Integr Cancer Ther* 2016; 1-11. doi: 10.1177/1534735416638737.  
26  
27  
28 31. Treanor CJ, McMenamin UC, O'Neill RF, Cardwell CR, Clarke MJ, Cantwell M,  
29 Donnelly M. Non-pharmacological interventions for cognitive impairment due to  
30 systemic cancer treatment. *Cochrane Database of Systematic Reviews* 2016, Issue 8. Art.  
31 No.: CD011325. DOI: 10.1002/14651858.CD011325.pub2.  
32  
33  
34  
35  
36  
37  
38  
39  
40  
41  
42  
43  
44  
45  
46  
47  
48  
49  
50  
51  
52  
53  
54  
55  
56  
57  
58  
59  
60



**Table 1** Demographic and clinical characteristics of participants with cognitive impairment and without cognitive impairment

| Variables                                                          | Mean (SD) / (%)                           |                                              |
|--------------------------------------------------------------------|-------------------------------------------|----------------------------------------------|
|                                                                    | With reported cognitive impairment (n=20) | Without reported cognitive impairment (n=11) |
| <b>Age (years) (range)</b>                                         | 46.40 (9.80) (19-57)                      | 43.45 (12.08) (19-56)                        |
| <b>Education levels</b>                                            |                                           |                                              |
| Primary school or below                                            | 11 (55.0)                                 | 5 (45.5)                                     |
| College                                                            | 6 (30.0)                                  | 5 (45.5)                                     |
| University or above                                                | 3 (15.0)                                  | 1 (9.0)                                      |
| <b>Employment status</b>                                           |                                           |                                              |
| Employed but on medical leave                                      | 10 (50.0)                                 | 7 (63.6)                                     |
| Unemployed or retired                                              | 10 (50.0)                                 | 4 (36.4)                                     |
| <b>Marital status</b>                                              |                                           |                                              |
| Married                                                            | 19 (95.0)                                 | 10 (90.9)                                    |
| Divorced                                                           | 1 (5.0)                                   | 1 (9.1)                                      |
| <b>Disease stage</b>                                               |                                           |                                              |
| Stage IA                                                           | 7 (35.0)                                  | 4 (36.4)                                     |
| Stage IB-IIA                                                       | 11 (55.0)                                 | 6 (54.5)                                     |
| Stage IIB-IVA                                                      | 2 (10.0)                                  | 1 (9.1)                                      |
| <b>Types of treatment</b>                                          |                                           |                                              |
| Surgery                                                            | 5 (25.0)                                  | 3 (27.3)                                     |
| Surgery + chemotherapy                                             | 5 (25.0)                                  | 4 (36.4)                                     |
| Surgery + radiation therapy                                        | 2 (10.0)                                  | 0 (0.0)                                      |
| Surgery+radiation+chemotherapy                                     | 6 (30.0)                                  | 2 (18.2)                                     |
| Radiation or chemotherapy                                          | 2 (10.0)                                  | 2 (18.2)                                     |
| <b>Time since completion of primary treatment (months) (range)</b> | 1.70 (1.03) (1-5)                         | 1.63 (1.20) (1-5)                            |

**Table 2** Major categories from the qualitative content analysis (N=20)

| Categories                                                            | n (%)     | Illustrative quotes from participants                                                                                                                                                                                                  |
|-----------------------------------------------------------------------|-----------|----------------------------------------------------------------------------------------------------------------------------------------------------------------------------------------------------------------------------------------|
| <b>Cognitive complaints</b>                                           |           |                                                                                                                                                                                                                                        |
| Lost concentration                                                    | 17(85.0)  | <i>It's difficult to focus on a conversation or when reading newspapers or books. My biggest problem is lack of concentration</i>                                                                                                      |
| Easily forgetting things or information told by others                | 15 (75.0) | <i>My memory changed a lot after chemotherapy; when I meet my friend on the street, I can't even remember her name. Sometimes, nurses tell me information about the illness, and I can't even remember what they have just told me</i> |
| Feeling it's hard to understand new things                            | 7 (35.0)  | <i>When I was reading some books, I saw the words, but I could not make sense of the words, even when I read the same sentence several times.</i>                                                                                      |
| Difficulties in finding right word in general conversation            | 4 (20.0)  | <i>When I speak with someone in general conversation, it's hard for me to find the right words</i>                                                                                                                                     |
| Slowing down in working efficiency, compared with how they used to be | 2 (10.0)  | <i>I was used to being well organised in my work and daily life, but now it's hard to get back all those abilities, and work has slowed down a lot</i>                                                                                 |
| <b>Perceived causing factors</b>                                      |           |                                                                                                                                                                                                                                        |
| Relating to chemotherapy                                              | 15 (75.0) | <i>Even during chemotherapy, I found that my memory changed a lot. Now I have completed the whole cycle of chemotherapy, and more and more memory impairment has appeared</i>                                                          |
| Side effects of cancer and its treatment                              | 12 (60.0) | <i>I believe that a lot of physical examinations, such as CT at the time of diagnosis, the use of analgesics, and the surgery procedure are all related to my cognitive problems</i>                                                   |
| Aging                                                                 | 8 (40.0)  | <i>Maybe due to my age, my memory is worse and I've started forgetting things quickly</i>                                                                                                                                              |
| Psychosocial issues                                                   | 3 (15.0)  | <i>Having to deal with too many sources of stress, such as the financial issues related to medical treatment</i>                                                                                                                       |
| Relating to immune function                                           | 2 (10.0)  | <i>After I got this disease and received this series of cancer treatments, my immune</i>                                                                                                                                               |

*function was destroyed, so my memory problems are partly due to this*

### **Coping strategies**

|                                                                               |           |                                                                                                                                                                                                                                                     |
|-------------------------------------------------------------------------------|-----------|-----------------------------------------------------------------------------------------------------------------------------------------------------------------------------------------------------------------------------------------------------|
| By writing memos                                                              | 15 (75.0) | <i>Writing down important things, use of diaries or phone reminders to organise daily tasks</i>                                                                                                                                                     |
| Self-adjustment and relaxation techniques                                     | 14 (70.0) | <i>Asking myself to focus on one task at a time. When disturbed by other things or people, I'll adjust myself and refocus on what I was doing. By reading, or listening to music for focus</i>                                                      |
| Doing nothing                                                                 | 6 (30.0)  | <i>Now I can do nothing for this problem (cognitive impairment), as this may be due to my age; with older age, cognitive decline appears naturally. Other patients believe these cognitive problems are reversible and may get better gradually</i> |
| Environment organisation                                                      | 2 (10.0)  | <i>To keep important personal belongs such as keys, eyeglasses, mobile phone in a fixed place</i>                                                                                                                                                   |
| TCM such as acupuncture                                                       | 1 (5.0)   | <i>Doctors told me there were no effective drug therapies for this problem, so I tried acupuncture</i>                                                                                                                                              |
| <b>Supportive care needs from health care providers</b>                       |           |                                                                                                                                                                                                                                                     |
| Providing common symptoms of cognitive impairment and its effective therapies | 11 (55.0) | <i>It's great for doctors and nurses to tell me common signs or symptoms of cognitive impairment, and provide intervention therapies to treat these problems</i>                                                                                    |
| Providing counselling services to family members                              | 8 (40.0)  | <i>It's hard for me to remember so much information. Health care providers should provide educational information and more counselling services to my family members</i>                                                                            |
| Need information about possible rehabilitation service                        | 7 (35.0)  | <i>After hospital discharge, where should I seek further rehabilitation service for cognitive problems, or can these problems recover gradually</i>                                                                                                 |
| Offering peer support networks                                                | 2 (10.0)  | <i>At the time of diagnosis and during cancer treatment, I felt so worried. I need to connect with women who have had a similar experience, in order to share coping</i>                                                                            |

strategies

**Impacts on**

|                            |          |                                                                                                                                                                                                                                                                                                                                       |
|----------------------------|----------|---------------------------------------------------------------------------------------------------------------------------------------------------------------------------------------------------------------------------------------------------------------------------------------------------------------------------------------|
| Daily lives                | 20 (100) | <i>Sometimes, when people talk with me, I immediately forget what they were talking about, or when I'm doing things and people interrupt me, I'll forget what I want to do</i>                                                                                                                                                        |
| Quality of life            | 9 (45.0) | <i>This disease and its treatment have severely impacted all aspects of my life and left me feeling overwhelmed. Now I have poor memory, a slowed thinking process, and a large financial burden as a result of the medical costs, causing tension in my family relationship</i>                                                      |
| Psychological health       | 5 (25.0) | <i>Sometimes my brain becomes blank, and it seems my memory could not come back, so I felt so frightened and scared</i>                                                                                                                                                                                                               |
| Work capability            | 3 (15.0) | <i>I have to leave my job, due to my body image now, during and after chemotherapy I lost a lot of hair, and I can't work for very long, I can only work for a short period of time, then I have to rest</i>                                                                                                                          |
| Physical health conditions | 2 (10.0) | <i>Cognitive function changes were not obvious, but my health condition was a lot worse; before the cancer diagnosis, my health was OK. But now my sleep is not good, my immune system is much weaker, and due to the loss of physical energy I can't work too long and need to take a break after working for just a short while</i> |

---

Abbreviation: TCM, traditional Chinese medicine

1  
2  
3 **Fig. 1** A preliminary cognition model among cervical cancer survivors after cancer treatment  
4  
5  
6  
7  
8  
9  
10  
11  
12  
13  
14  
15  
16  
17  
18  
19  
20  
21  
22  
23  
24  
25  
26  
27  
28  
29  
30  
31  
32  
33  
34  
35  
36  
37  
38  
39  
40  
41  
42  
43  
44  
45  
46  
47  
48  
49  
50  
51  
52  
53  
54  
55  
56  
57  
58  
59  
60

For peer review only

1  
2  
3  
4  
5  
6  
7  
8  
9  
10  
11  
12  
13  
14  
15  
16  
17  
18  
19  
20  
21  
22  
23  
24  
25  
26  
27  
28  
29  
30  
31  
32  
33  
34  
35  
36  
37  
38  
39  
40  
41  
42  
43  
44  
45  
46  
47  
48  
49  
50  
51  
52  
53  
54  
55  
56  
57  
58  
59  
60

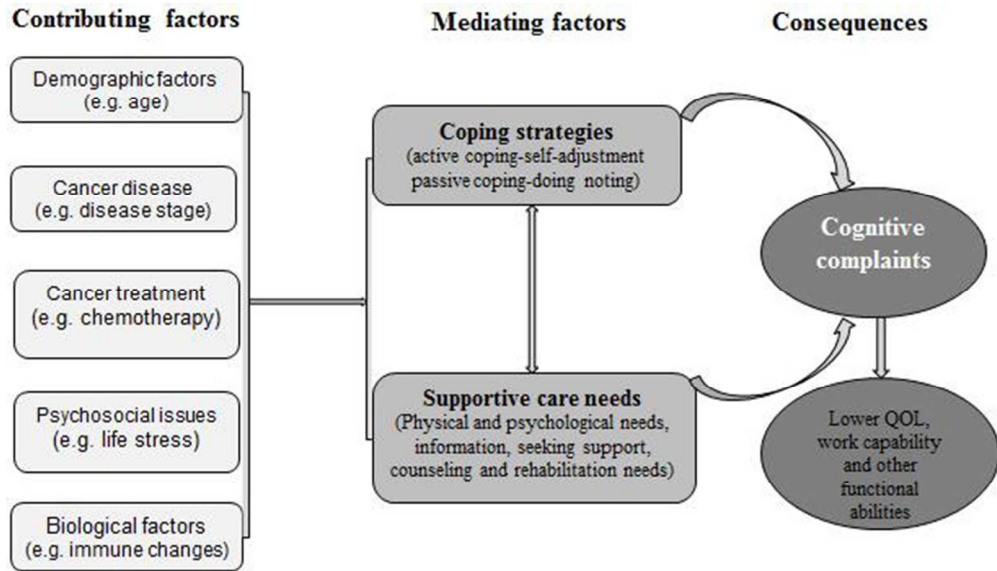

Fig. 1 A preliminary cognition model among cervical cancer survivors after cancer treatment  
Figure 1

review only

## Appendix 1 Consolidated criteria for reporting qualitative studies (COREQ) checklist

| COREQ items                                 | Descriptions                                                                                                                         |
|---------------------------------------------|--------------------------------------------------------------------------------------------------------------------------------------|
| Domain 1: Research team and reflexivity     |                                                                                                                                      |
| 1. Interviewer/facilitator                  | The third author conducted the interview                                                                                             |
| 2. Credentials                              | The researcher is nursing professor and holds Master degree of Nursing                                                               |
| 3. Occupation                               | Clinical nursing researcher at the time of the study                                                                                 |
| 4. Gender                                   | Female                                                                                                                               |
| 5. Experience and training                  | The researcher works for clinical researcher for more than 5 years with qualitative research training                                |
| Relationship with participants              |                                                                                                                                      |
| 6. Relationship established                 | Working relationship was established prior to study commencement                                                                     |
| 7. Participant knowledge of the interviewer | Participants know about the researcher for doing the research                                                                        |
| 8. Interviewer characteristics              | Described at page 7 in the manuscript                                                                                                |
| Domain 2: study design                      |                                                                                                                                      |
| Theoretical framework                       |                                                                                                                                      |
| 9. Methodological orientation and Theory    | Methodological orientation underpinning the study was content analysis and was guided by a conceptual model by Myers (2009) (page 6) |
| Participant selection                       |                                                                                                                                      |
| 10. Sampling                                | Purposive sampling described at page 6                                                                                               |
| 11. Method of approach                      | Participants approached by face-to-face                                                                                              |
| 12. Sample size                             | 31 participants in this study                                                                                                        |
| 13. Non-participation                       | 19 participants refused, reasons described at page 8 to page 9                                                                       |
| Setting                                     |                                                                                                                                      |
| 14. Setting of data collection              | Hospital's meeting room (page 7)                                                                                                     |
| 15. Presence of non-participants            | Nobody else present besides the participants and researchers (page 8)                                                                |
| 16. Description of sample                   | Table 1.                                                                                                                             |
| Data collection                             |                                                                                                                                      |
| 17. Interview guide                         | Consisting of 7 open-ended questions and was pilot tested in a participants (page 7)                                                 |
| 18. Repeat interviews                       | None                                                                                                                                 |
| 19. Audio/visual recording                  | N/A. as this study collected data by written narratives                                                                              |
| 20. Field notes                             | Yes, at page 7                                                                                                                       |
| 21. Duration                                | 30-45 minutes (page 7)                                                                                                               |
| 22. Data saturation                         | Yes, described at page 7                                                                                                             |
| 23. Transcripts returned                    | Transcripts were returned to three participants for comments or correction                                                           |
| Domain 3: analysis and findings             |                                                                                                                                      |
| Data analysis                               |                                                                                                                                      |

|    |                                    |                                                     |
|----|------------------------------------|-----------------------------------------------------|
| 1  |                                    |                                                     |
| 2  |                                    |                                                     |
| 3  | 24. Number of data coders          | Twenty copies of data coded                         |
| 4  | 25. Description of the coding tree | None                                                |
| 5  | 26. Derivation of themes           | Themes were derived from the data (Table2)          |
| 6  | 27. Software                       | Nvivo 11 was used to manage the data                |
| 7  | 28. Participant checking           | Three participants checked the final transcript of  |
| 8  |                                    | this study                                          |
| 9  |                                    |                                                     |
| 10 | Reporting                          |                                                     |
| 11 | 29. Quotations presented           | Table 2                                             |
| 12 | 30. Data and findings consistent   | There was consistency between the data presented    |
| 13 |                                    | and the findings.                                   |
| 14 | 31. Clarity of major themes        | Major themes clearly presented in the findings      |
| 15 |                                    | (Table 2)                                           |
| 16 | 32. Clarity of minor themes        | Any diverse cases were resolved during the stage of |
| 17 |                                    | data analysis.                                      |
| 18 |                                    |                                                     |
| 19 |                                    |                                                     |
| 20 |                                    |                                                     |
| 21 |                                    |                                                     |
| 22 |                                    |                                                     |
| 23 |                                    |                                                     |
| 24 |                                    |                                                     |
| 25 |                                    |                                                     |
| 26 |                                    |                                                     |
| 27 |                                    |                                                     |
| 28 |                                    |                                                     |
| 29 |                                    |                                                     |
| 30 |                                    |                                                     |
| 31 |                                    |                                                     |
| 32 |                                    |                                                     |
| 33 |                                    |                                                     |
| 34 |                                    |                                                     |
| 35 |                                    |                                                     |
| 36 |                                    |                                                     |
| 37 |                                    |                                                     |
| 38 |                                    |                                                     |
| 39 |                                    |                                                     |
| 40 |                                    |                                                     |
| 41 |                                    |                                                     |
| 42 |                                    |                                                     |
| 43 |                                    |                                                     |
| 44 |                                    |                                                     |
| 45 |                                    |                                                     |
| 46 |                                    |                                                     |
| 47 |                                    |                                                     |
| 48 |                                    |                                                     |
| 49 |                                    |                                                     |
| 50 |                                    |                                                     |
| 51 |                                    |                                                     |
| 52 |                                    |                                                     |
| 53 |                                    |                                                     |
| 54 |                                    |                                                     |
| 55 |                                    |                                                     |
| 56 |                                    |                                                     |
| 57 |                                    |                                                     |
| 58 |                                    |                                                     |
| 59 |                                    |                                                     |
| 60 |                                    |                                                     |



# BMJ Open

## Cervical cancer survivors' perceived cognitive complaints and supportive care needs in mainland China: A qualitative study

|                                 |                                                                                                                                                                                                                                                                                                                                                                                                                                                               |
|---------------------------------|---------------------------------------------------------------------------------------------------------------------------------------------------------------------------------------------------------------------------------------------------------------------------------------------------------------------------------------------------------------------------------------------------------------------------------------------------------------|
| Journal:                        | <i>BMJ Open</i>                                                                                                                                                                                                                                                                                                                                                                                                                                               |
| Manuscript ID                   | bmjopen-2016-014078.R3                                                                                                                                                                                                                                                                                                                                                                                                                                        |
| Article Type:                   | Research                                                                                                                                                                                                                                                                                                                                                                                                                                                      |
| Date Submitted by the Author:   | 09-Feb-2017                                                                                                                                                                                                                                                                                                                                                                                                                                                   |
| Complete List of Authors:       | Zeng, Y; The Hong Kong Polytechnic University, Department of Rehabilitation Sciences; The Third Affiliated Hospital of Guangzhou Medical University, Research Institute of Gynecology and Obstetrics<br>Cheng, Andy; The Hong Kong Polytechnic University, Department of Rehabilitation Sciences<br>Liu, Xiangyu; Hunan Cancer Hospital, Department of Nursing<br>Chan, Chetwyn ; The Hong Kong Polytechnic University, Department of Rehabilitation Sciences |
| <b>Primary Subject Heading</b>: | Qualitative research                                                                                                                                                                                                                                                                                                                                                                                                                                          |
| Secondary Subject Heading:      | Oncology, Qualitative research                                                                                                                                                                                                                                                                                                                                                                                                                                |
| Keywords:                       | Cervical cancer, Survivors, Cognitive complaints, Supportive care needs                                                                                                                                                                                                                                                                                                                                                                                       |
|                                 |                                                                                                                                                                                                                                                                                                                                                                                                                                                               |

SCHOLARONE™  
Manuscripts

1  
2  
3 **Title: Cervical cancer survivors' perceived cognitive complaints and supportive care needs**  
4  
5  
6 **in mainland China: A qualitative study**

7  
8 Yingchun Zeng<sup>1,2</sup>, MPhil, PhD Candidate; Andy SK Cheng<sup>1</sup>, PhD; Xiangyu Liu<sup>3</sup>, Chetwyn  
9  
10 CH Chan<sup>1</sup>, PhD  
11

12  
13  
14  
15 **Author Affiliations:**

16  
17 <sup>1</sup>Department of Rehabilitation Sciences, The Hong Kong Polytechnic University, Hong Kong,  
18  
19 China  
20

21  
22 <sup>2</sup>Research Institute of Gynaecology and Obstetrics, The Third Affiliated Hospital of  
23  
24 Guangzhou Medical University, Guangzhou, China  
25

26  
27 <sup>3</sup>Department of Nursing, Hunan Cancer Hospital, Changsha, China  
28  
29  
30  
31  
32  
33

34 **Correspondence:** Dr Andy Cheng, Department of Rehabilitation Sciences, The Hong Kong  
35  
36 Polytechnic University, Hung Hom, Hong Kong, China (Email: andy.cheng@polyu.edu.hk).  
37  
38  
39  
40  
41  
42  
43  
44  
45  
46  
47  
48  
49  
50  
51  
52  
53  
54  
55  
56  
57  
58  
59  
60

## Abstract

**Objectives:** This study explores Chinese cervical cancer survivors' perceived cognitive complaints and relevant supportive care needs after primary cancer treatment.

**Design:** This study utilised a qualitative research design. A semi-structured interview was used to probe cervical cancer patients' perceived cognitive complaints and supportive care needs.

**Setting:** This study was conducted at a secondary cancer care centre located in South China.

**Participants:** 31 women with cervical cancer after primary cancer treatment, ages 18-60, were purposively selected using non-random sampling procedures.

**Results:** A total of 31 cervical cancer survivors joined this study. Of that total, 20 women (64.5%) reported cognitive complaints after cancer treatment. The most common complaint was loss of concentration (n=17, 85.0%). Perceived contributing factors to these cognitive complaints included chemotherapy (n=15, 75.0%), and aging (n=8, 40.0%). These cognitive problems most commonly impacted daily living (n=20, 100%). Common supportive care needs included symptom management strategies (n=11, 55.0%), and counselling services (n=8, 40.0%).

**Conclusion:** This study adds new insight into the growing body of research on cognitive complaints by cancer survivors, in particular Chinese cervical cancer survivors. Improved understanding of cognitive complaints could subsequently facilitate the development of relevant therapeutic interventions for prevention; as well as the provision of supportive care services, such as educational and counselling services, to reduce cognitive impairment in women with cervical cancer.

### Study strengths and limitations

- This qualitative study used written responses as a means of data collection, which is a more cost-effective and less time-consuming method, as it does not require transcription.
- An additional study strength is that written qualitative responses could overcome the Chinese dialect barrier, as Chinese people, even within the same province, typically speak many different dialects. The written language is understandable across all dialect groups.
- This preliminary study recruited participants at a single medical centre, which could limit the transferability of study findings.
- This study included participants who had completed primary cancer treatment within a short time frame; longitudinal research should be conducted to identify the trajectory of cognitive complaints over the cancer care continuum.

**Keywords** Cervical cancer. Survivors. Cognitive complaints. Supportive care needs.

## Introduction

Cervical cancer is the second most common cancer, followed by breast cancer, among women in China.<sup>1</sup> Due to medical advancements in early detection and the possibility of curative cancer treatment,<sup>2</sup> the five-year relative survival rate of cervical cancer in mainland China is up to 69% for all stages.<sup>1</sup> As more cervical cancer survivors are living longer after curative treatment, the late effects of cancer treatment are becoming increasingly common.<sup>3</sup> One such long-term and late effect is neurocognitive, which has emerged as a significant problem affecting cervical cancer survivors.<sup>4,5</sup>

Cognitive complaints often refer to cognitive impairment or cancer-related cognitive impairment.<sup>6,7</sup> Other studies have described this as chemotherapy-related cognitive dysfunction, colloquially named ‘chemo brain’ or ‘chemo fog’.<sup>8,9</sup> Cognitive complaints have the potential to significantly impact both social and occupational functioning, interfering with the ability to carry out normal daily activities, all of which in turn contributes to lower quality of life (QOL) for cancer survivors.<sup>4,6,10</sup> Cognitive complaints have been reported in approximately 40% of patients prior to any cancer treatment, and as many as 75% of patients indicate some degree of cognitive impairment during the period of active cancer treatment. Finally, cognitive complaints are still present in up to 60% of long-term cancer survivors.<sup>6</sup> In a study conducted in mainland China, female cancer survivors with an average of 2.79 years post-primary treatment reported higher levels of cognitive limitations, significantly reducing their work productivity and global QOL.<sup>11</sup>

Quantitative research approaches are employed to explore cognitive complaints and related supportive care issues among cancer survivors,<sup>4,12</sup> with researchers proposing that quantitative cognitive measures are more objective and reliable than qualitative exploration of cognitive

1  
2  
3 problems in cancer survivors.<sup>13,14</sup> However, other researchers have argued there are inherent  
4  
5 difficulties with a quantitative approach, in terms of fully appreciating cancer patients' cognitive  
6  
7 complaints.<sup>4,15</sup> Qualitative research studies would enable us to identify the presence of cognitive  
8  
9 symptoms that quantitative approaches cannot detect, either by self-reported cognitive measures  
10  
11 or neurocognitive tests.<sup>15</sup> In addition, qualitative in-depth interviews could provide information  
12  
13 about how cognitive impairment impacts cancer patients' QOL, and could allow researchers to  
14  
15 obtain rich information about numerous coping strategies to ameliorate cognitive dysfunction  
16  
17 symptoms, as well as develop intervention strategies.<sup>15</sup>  
18  
19  
20  
21  
22

23 Therefore, there is a need for a qualitative study to explore perceived cognitive complaints and  
24  
25 relevant supportive care needs of cervical cancer survivors after primary cancer treatment. A  
26  
27 clear understanding of the cognitive complaints experienced by cervical cancer survivors,  
28  
29 through qualitative in-depth interviews, could aid healthcare providers in developing targeted  
30  
31 interventions, as well as in providing relevant supportive care services to alleviate the extent and  
32  
33 impact of cancer survivors' cognitive complaints.<sup>16</sup>  
34  
35  
36  
37  
38  
39  
40

## 41 **Methods**

### 42 43 44 *Design*

45  
46  
47 This study utilised a qualitative research design. A semi-structured interview was used to probe  
48  
49 cervical cancer patients' perceived cognitive complaints and supportive care needs.  
50  
51  
52  
53  
54  
55  
56  
57  
58  
59  
60

### ***Study framework***

This study was guided by the conceptual model of chemotherapy-related changes in cognitive function proposed by Myers.<sup>17</sup> This model consists of three key components: antecedents (cancer diagnosis and cancer treatment), mediators (physiologic, psychosocial and situational factors), and consequences (quality of life and functional ability).<sup>17</sup> While this model is described as chemotherapy-related cognitive impairment, recent evidence indicates that cancer itself is also related to cognitive impairment.<sup>6</sup> As suggested by Myers, when researchers learn more about the physiological and psychological aspects of cognitive impairment, this model will require refining.<sup>17</sup>

### ***Study sample***

All study participants were recruited from the Gynaecological Oncology Unit in a cancer hospital. This study obtained ethical approval from the hospital's ethics committee. A purposive sampling was drawn to recruit eligible informants. Inclusion criteria were: women who were at least 18 years old, with a primary diagnosis of cervical cancer, and who had completed their primary cancer treatment of surgery, radiation therapy or chemotherapy. Exclusion criteria included potential psychiatric disorders, previous cancer history, or traumatic brain injury.

### ***Study procedure and qualitative interviews***

After obtaining the ethical approval, the participants were recruited from the hospital's gynaecological inpatient department. The third author assessed the eligibility of participants. The eligible women were invited to the hospital's meeting room for completing the semi-structured interview individually. These eligible participants were asked to participate in a semi-structured interview, and complete a socio-demographic sheet. This sheet was used to collect information

1  
2  
3 on demographic and clinical characteristics, including age, education level, marital status,  
4  
5  
6 tumour stage, type of cancer treatment received, and time since completion of primary cancer  
7  
8 treatment. Qualitative interviews were guided by a narrative epistemology in order to encourage  
9  
10 participants to provide narrative accounts of their perceived experience.<sup>18</sup> Researcher  
11  
12 characteristics: The third author, who conducted the interview, is a nursing professor who holds a  
13  
14 Master of Nursing degree. All researchers in this study have been conducting clinical research  
15  
16 for more than five years, and all have qualitative research training. The interviewer was an  
17  
18 female experienced research nurse who was not a staff nurse in the research setting of the  
19  
20 Gynaecological Oncology Unit, and the data collection method was by written narrative, so that  
21  
22 the interviewer's beliefs, biases and preconceptions would have no influence on the direction of  
23  
24 the interviews. No non-participants were present in in the interview, and the interviewer only  
25  
26 remained in the meeting room to take field notes, in order to capture any emerging thoughts to  
27  
28 guide data analysis.  
29  
30  
31  
32  
33

34  
35 The interviews were conducted face-to-face in the in-patient ward's meeting room. All  
36  
37 interviews utilised an interview guide comprised of the following open-ended questions: 1)  
38  
39 Compared to before your cancer diagnosis, tell us about the overall change in your cognitive  
40  
41 abilities? For example, your perceptions of understanding what people say to you; thinking of the  
42  
43 right word when responding to others; and feeling confident about completing a task or taking on  
44  
45 new tasks. 2) What do you think the common contributing factors to any cognitive changes  
46  
47 might be? 3) How do these perceived cognitive changes impact your daily life or your ability to  
48  
49 work? 4) How do you deal with these changes? In other words, what types of coping strategies  
50  
51 do you use as a result of any cognitive changes you might be experiencing? 5) What types of  
52  
53 supportive care services do you need from healthcare providers, to help you cope with any  
54  
55  
56  
57  
58  
59  
60



1  
2  
3 cognitive complaints? Each interview lasted 30 to 45 minutes, and was recorded by a digital  
4 recorder and transcribed verbatim. Data saturation was achieved much earlier than the final  
5 sample size of 31 patients, as data collection and analysis were performed simultaneously in an  
6 iterative process.<sup>19</sup>  
7  
8  
9  
10  
11  
12  
13  
14  
15  
16  
17  
18  
19  
20  
21  
22  
23  
24  
25  
26  
27  
28  
29  
30  
31  
32  
33  
34  
35  
36  
37  
38  
39  
40  
41  
42  
43  
44  
45  
46  
47  
48  
49  
50  
51  
52  
53  
54  
55  
56  
57  
58  
59  
60

For peer review only

### ***Data analysis***

Qualitative interview data were transcribed to produce a verbatim transcript. During the entire data analysis process, the researcher consciously separated herself from personal biases, in order to be open to the information shared by study participants. NVivo 11 qualitative software (<http://www.qsrinternational.com/nvivo-product/nvivo11-for-windows>) was applied to organise and code the verbatim transcript. Qualitative content analysis was used to prepare, organise, and report the data.<sup>20</sup> A three-step content analysis process was followed: "1) *The verbatim transcript was organised into meaning units (such as words, phrases, sentences or paragraphs that conveyed similar content deemed important in understanding patients' experiences).* 2) *The meaning units were coded and categorised.* 3) *The abstraction process was guided by Myers's conceptual model and continued until primary themes were identified.*<sup>20</sup>

Two research members conducted content analysis independently. In case of any disagreement with the interpretation of clusters or categories, a third research member was involved in the discussion process, in order to establish a consensus. To ensure the study findings were accurately reflecting informants' truly perceived experience of cognitive changes, three research participants were invited to check the final verbatim transcript for the purpose of collecting participants' feedback and validation. The consolidated criteria for reporting qualitative studies (COREQ) checklist was applied to guide this study and ensure study rigour (Appendix 1).<sup>21</sup>

### **Results**

A total of 50 patients with cervical cancer were approached, with 31 agreeing to participate in this written narrative interview. Those who did not join this study had no interest in participating

1  
2  
3 in any type of research. Their characteristics in terms of age, cancer stage and treatment types  
4  
5 were comparable to the patients who completed semi-structured interviews. Of the 31  
6  
7 participants, 20 women (64.5%) reported cognitive complaints after cancer treatment. The socio-  
8  
9 demographic and clinical characteristics of women with cognitive impairment and without  
10  
11 perceived cognitive impairment are listed in Table 1. From Table 1, the demographic/clinical  
12  
13 characteristics of women with and without perceived cognitive impairment were comparable.  
14  
15

16  
17  
18 Major categories that emerged from the data – which included cognitive complaints; perceived  
19  
20 contributing factors; the impact of cognitive problems on women's daily lives, health outcomes  
21  
22 and work capabilities; coping strategies; and patients' supportive care needs from health care  
23  
24 providers - are shown in Table 2. The most common complaint was loss of concentration (n=17,  
25  
26 85.0%), followed by memory problems (n=15, 75.0%). Other common cognitive complaints  
27  
28 included difficulties in learning, language issues (finding the right words in everyday  
29  
30 conversations), and a slowed rate of information processing.  
31  
32  
33

34  
35  
36 The participants identified several factors that they believed were contributing to their cognitive  
37  
38 complaints, including chemotherapy (n=15, 75.0%), side effects of cancer and other treatment,  
39  
40 such as surgery or radiation therapy (n=12, 60.0%), and aging (n=8, 40.0%). These cognitive  
41  
42 complaints had negative impacts on daily life, sleep and rest (n=20, 100%). Two participants  
43  
44 indicated their cognitive function had seen negligible change, but their physical health had  
45  
46 deteriorated significantly after the diagnosis of cervical cancer. While 10 women were on  
47  
48 medical leave at the time of data collection, two women indicated they were planning to leave  
49  
50 their jobs due to loss of concentration and slowed information processing capacity.  
51  
52  
53  
54  
55  
56  
57  
58  
59  
60

1  
2  
3 As shown in Table 2, the most commonly used coping strategies were memo writing (n=15,  
4 75.0%), and self-adjustment (n=14, 70.0%). Other coping strategies included “doing nothing”  
5  
6 and organisation of their environment. In addition, one woman sought acupuncture as an  
7  
8 alternative therapy, after her physician told her there was no effective medication for cognitive  
9  
10 impairment thus far. Chinese cervical cancer survivors describe a variety of supportive care  
11  
12 requirements, such as patient, as well as family education, on the common signs and symptoms  
13  
14 of cognitive impairment; along with effective treatment therapies (n=11, 55.0%); counselling for  
15  
16 family members (n=8, 40.0%); and information on further rehabilitation services (n=7, 35.0%).  
17  
18 Two women expressed the need for peer support, and suggested that healthcare providers could  
19  
20 organise a peer support group for patients starting from the diagnosis stage onward. Several  
21  
22 patients indicated that their healthcare providers had never mentioned the potential for cognitive  
23  
24 impairment, and only addressed this when patients asked about cognitive problems that appeared  
25  
26 during cancer treatment.  
27  
28  
29  
30  
31  
32  
33

34  
35 Based on the conceptual model of chemotherapy-related changes in cognitive function proposed  
36  
37 by Myers (2009), and in combination with a synthesis of these qualitative findings, a new  
38  
39 cognition model among cervical cancer survivors is illustrated in Figure 1. Cognitive complaints  
40  
41 are multifactorial in nature, with contributing factors that include demographic characteristics,  
42  
43 biological factors, psychological distress, disease stage and cancer therapies.  
44  
45  
46  
47  
48  
49  
50

## 51 **Discussion**

52  
53  
54 This is one of the first published studies exploring cognitive complaints among Chinese cervical  
55  
56 cancer survivors, while there is accumulating evidence documenting cognitive impairment issues  
57  
58  
59  
60

1  
2  
3 among cancer survivors, mainly dominated by breast cancer survivors.<sup>22</sup> The prevalence of  
4 cognitive complaints among Chinese cervical cancer survivors was 64.5%, which is consistent  
5 with previous research.<sup>6</sup> As this study was preliminary and adopted a small and non-random  
6 sample, epidemiological studies are needed to further quantify the prevalence, impact and extent  
7 of cognitive complaints in this study population.<sup>23</sup>

8  
9  
10  
11  
12  
13  
14  
15  
16 Concurring with previous research evidence, chemotherapy and the side effects of cancer are the  
17 most common factors associated with cognitive complaints.<sup>4,7</sup> This study identified that cervical  
18 cancer survivors perceive aging as a likely contributing factor to cognitive impairment. Study  
19 participants considered “aging as a normal process of cognitive decline,” and viewed cognitive  
20 impairment as a process that could not be changed. Consistent with previous studies,<sup>17,24</sup> study  
21 participants also reported that worry, fatigue and pain all seem to be related to cognitive  
22 impairment.

23  
24  
25  
26  
27  
28  
29  
30  
31  
32  
33 The patient experience of cancer-related cognitive impairment may be the commonality of the  
34 phenomenon across tumour types,<sup>25</sup> as this study did not find unique cognitive deficits in women  
35 with cervical cancer. However, this study did identify unique cultural issues for Chinese women  
36 seeking coping strategies for cognitive impairment. Some women did nothing to try to cope with  
37 their cognitive complaints. ‘Doing nothing’ as a common coping strategy for cognitive  
38 complaints could be related to the Chinese Taoist philosophy: “Accepting the fact that a situation  
39 cannot be changed, and telling oneself that one should do little, as things will be all right at the  
40 end of the day”.<sup>26</sup> Hence, a coping strategy of doing nothing and self-adjustment could help these  
41 survivors maintain a sense of calm when facing difficulties that cannot be changed.

1  
2  
3 As in previous studies,<sup>4,6,7</sup> this study's findings also revealed that cognitive complaints had a  
4 variety of consequences that impacted daily living, QOL, physical and psychological health, and  
5 work capabilities. While research into the relationship between cognitive functioning and work  
6 ability is still in its infancy,<sup>27</sup> returning to work is a critical milestone for many survivors, since  
7 work plays a key role in psychological, economic, and social well-being.<sup>28</sup> If cancer survivors  
8 were able to obtain individualised support and work-related adjustments from their employer,  
9 they would be more likely to continue working.<sup>23</sup> Hence, cognitive complaints in cancer  
10 survivors generate numerous supportive care requirements, not only in the workplace, but also  
11 from healthcare providers.  
12  
13  
14  
15  
16  
17  
18  
19  
20  
21  
22  
23

24  
25 Common supportive care needs that patients require from healthcare providers include the  
26 provision of information on the common signs of cognitive impairment, as well as management  
27 strategies, effective treatment therapies and possible rehabilitation services, in order to manage  
28 cognitive problems. Although many healthcare providers may gloss over the issue of patient  
29 cognitive complaints, believing they have no curative treatment to offer patients,<sup>29</sup> findings from  
30 a meta-analysis indicate that neuropsychological interventions (cognitive rehabilitation,  
31 cognitive training and neuromodulation strategies) can improve cognitive function in cancer  
32 survivors.<sup>30</sup> In particular, a recent Cochrane review indicates that cognitive training may be  
33 effective in improving patients' cognitive function, as well as their quality of life.<sup>31</sup> Additionally,  
34 behavioural intervention strategies (increasing physical activity levels and fostering supportive  
35 social relationships) could be helpful in improving cognitive function among cancer survivors.<sup>12</sup>  
36  
37  
38  
39  
40  
41  
42  
43  
44  
45  
46  
47  
48  
49  
50  
51

52 Through a synthesis of these study findings, a preliminary cognition model for cervical cancer  
53 survivors after cancer treatment was established, to provide a theoretical underpinning for the  
54 perception of cognitive complaints, contributing factors, mediating factors, and the consequences  
55  
56  
57  
58  
59  
60

1  
2  
3 of cognitive impairment in this study population. This model may be able to inform and  
4 stimulate further intervention studies. Certainly, this preliminary cognition model of can be  
5 continuously refined through further empirical research investigations. Overall, this model  
6 illustrates coping strategies at a personal level, through self-adjustment or by doing nothing.  
7  
8 Additionally, supportive care services, such as education and counselling for family members,  
9 could mitigate the consequences of cognitive impairment. In addition, participants felt a great  
10 need for support, including peer support, from diagnosis onwards, as well as for information on  
11 available rehabilitation services and counselling, in order to modulate the degree of cognitive  
12 complaints. For survivors of cervical cancer, cognitive complaints exert negative effects on daily  
13 living, QOL, work capability, and physical and psychological health.  
14  
15  
16  
17  
18  
19  
20  
21  
22  
23  
24  
25  
26

### 27 **Limitations and implications for future research**

28  
29  
30  
31 This preliminary study has two limitations. First, this study only recruited participants at a single  
32 medical centre, and the sample size could not be representative of this population in general.  
33  
34 This study primarily offers significant insights into perceived cognitive complaints, contributing  
35 factors and consequences of cognitive impairment in cervical cancer survivors. Second, this  
36 study utilised a cross-sectional design and included participants who had completed primary  
37 cancer treatment within a short period of time. Future longitudinal research should be conducted  
38 to identify the trajectory of cognitive complaints over the cancer care continuum. As Myers  
39 suggested,<sup>25</sup> qualitative studies provide valuable information for healthcare professionals on the  
40 impact of cognitive changes on cancer patients' QOL and activities of daily living.  
41  
42 Understanding cancer patients' experience of cognitive impairment, their coping strategies and  
43 supportive care needs could help healthcare professionals develop interventions to prevent,  
44 mitigate, and treat the cognitive sequelae of cancer and its treatment therapies.<sup>25</sup>  
45  
46  
47  
48  
49  
50  
51  
52  
53  
54  
55  
56  
57  
58  
59  
60

## Conclusion

This study adds new insight into the growing body of research on cognitive complaints by cancer survivors, in particular Chinese survivors of cervical cancer. Improved understanding of cognitive complaints could subsequently facilitate the development of relevant therapeutic interventions for prevention, as well as for the provision of supportive care services such as education and counselling, to reduce cognitive impairment in women with cervical cancer.



1  
2  
3 **Acknowledgments:** Thanks to all participants who voluntarily joined this study and generously  
4 shared their views and concerns.  
5  
6  
7

8  
9 **Contributors:** ZYC and ASKC are the main authors, designing this study and drafting this  
10 manuscript. LXY conducted interviews; LXY and ZYC analysed data independently. CCHC  
11 made a significant contribution to the manuscript revisions.  
12  
13  
14

15  
16  
17 **Funding:** None.  
18  
19

20 **Competing interests:** The authors declare no conflicts of interest.  
21  
22

23 **Ethics approval:** This study was approved by the Medical Ethics Committee of Hunan Cancer  
24 Hospital.  
25  
26  
27

28  
29 **Data sharing statement:** No additional data are available.  
30  
31  
32  
33  
34  
35  
36  
37  
38  
39  
40  
41  
42  
43  
44  
45  
46  
47  
48  
49  
50  
51  
52  
53  
54  
55  
56  
57  
58  
59  
60

## References

1. Chen W, Zheng R, Baade PD, Zhang S, Zeng H, Bray F, et al. Cancer statistics in China, 2015. *CA: Cancer J Clin* 2016; 66: 115–132. doi: 10.3322/caac.21338.
2. Lange M, Rigal O, Clarisse B, Giffard B, Sevin E, Barillet M, et al. Cognitive dysfunctions in elderly cancer patients: a new challenge for oncologists. *Cancer Treat Rev* 2014; 40: 810-817. doi: 10.1016/j.ctrv.2014.03.003.
3. Treanor C, Donnelly M. Late effects of cancer and cancer treatment- a rapid review. *J Community Supportive Oncol* 2014; 12:137-148.
4. Craig CD, Monk BJ, Farley JH, Chase DM. Cognitive impairment in gynecologic cancers: a systematic review of current approaches to diagnosis and treatment. *Support Care Cancer* 2014; 22: 279-287. doi: 10.1007/s00520-013-2029-7.
5. Faubion SS, MacLaughlin KL, Long ME, Pruthi S, Casey PM. Surveillance and Care of the Gynecologic Cancer Survivor. *J Womens Health (Larchmt)* 2015; 24: 899-906. doi: 10.1089/jwh.2014.5127.
6. Wefel JS, Kesler SR, Noll KR, Schagen SB. Clinical characteristics, pathophysiology, and management of noncentral nervous system cancer-related cognitive impairment in adults. *CA Cancer J Clin* 2015; 65: 123-138. doi: 10.3322/caac.21258.
7. Janelins MC, Kesler SR, Ahles TA, Morrow GR. Prevalence, mechanisms, and management of cancer-related cognitive impairment. *Int Rev Psychiatry* 2014; 26:102–113. doi:10.3109/09540261.2013.864260.
8. Wefel JS, Schagen SB. Chemotherapy-related cognitive dysfunction. *Curr Neurol Neurosci Rep* 2012; 12: 267–275. doi:10.1007/s11910-012-0264-9

- 1  
2  
3  
4  
5  
6  
7  
8  
9  
10  
11  
12  
13  
14  
15  
16  
17  
18  
19  
20  
21  
22  
23  
24  
25  
26  
27  
28  
29  
30  
31  
32  
33  
34  
35  
36  
37  
38  
39  
40  
41  
42  
43  
44  
45  
46  
47  
48  
49  
50  
51  
52  
53  
54  
55  
56  
57  
58  
59  
60
9. Hines S, Ramis MA, Pike S, Chang AM. The effectiveness of psychosocial interventions for cognitive dysfunction in cancer patients who have received chemotherapy: a systematic review. *Worldviews Evid Based Nurs* 2014; 11:187-193. doi: 10.1111/wvn.12042.
10. Correa DD, Hess LM. Cognitive function and quality of life in ovarian cancer. *Gynecol Oncol* 2012; 124: 404-409. doi: 10.1016/j.ygyno.2011.11.005.
11. Zeng Y, Cheng ASK, Liu X, Feuerstein M. Symptom profiles, work productivity and quality of life among Chinese female cancer survivors. *Gynecol Obstet (Sunnyvale)* 2016; 6: 357. doi:10.4172/2161-0932.1000357
12. Henneghan A. Modifiable factors and cognitive dysfunction in breast cancer survivors: a mixed-method systematic review. *Support Care Cancer* 2016; 24(1):481–497. doi: 10.1007/s00520-015-2927-y.
13. Dutta V. Chemotherapy, neurotoxicity, and cognitive changes in breast cancer. *J Cancer Res Ther* 2011; 7: 264-269. doi: 10.4103/0973-1482.87008.
14. Hess LM, Chambers SK, Hatch K, Hallum A, Janicek MF, Buscema J et al. Pilot study of the prospective identification of changes in cognitive function during chemotherapy treatment for advanced ovarian cancer. *J Support Oncol* 2010; 8: 252-258.
15. Wu LM, Tanenbaum ML, Dijkers M, Amidi A, Hall SJ, Penedo FJ et al. Cognitive and neurobehavioral symptoms in patients with nonmetastatic prostate cancer treated with androgen deprivation therapy or observation: A mixed methods study. *Soc Sci Med* 2016; 156: 80-89. doi: 10.1016/j.socscimed.

- 1  
2  
3  
4  
5  
6  
7  
8  
9  
10  
11  
12  
13  
14  
15  
16  
17  
18  
19  
20  
21  
22  
23  
24  
25  
26  
27  
28  
29  
30  
31  
32  
33  
34  
35  
36  
37  
38  
39  
40  
41  
42  
43  
44  
45  
46  
47  
48  
49  
50  
51  
52  
53  
54  
55  
56  
57  
58  
59  
60
16. Boykoff N, Moieni M, Subramanian SK. Confronting chemobrain: an in-depth look at survivors' reports of impact on work, social networks, and health care response. *J Cancer Surviv* 2009; 3(4):223–232. doi:10.1007/s11764-009-0098-x.
17. Myers JS. A comparison of the theory of unpleasant symptoms and the conceptual model of chemotherapy-related changes in cognitive function. *Oncol Nurs Forum* 2009;36(1):E1-10. doi: 10.1188/09.ONF.E1-E10.
18. Benzein E, Norberg A, Saveman BI. The meaning of the lived experience of hope in patients with cancer in palliative home care. *Palliat Med* 2001; 15:117–126.
19. Sandelowski M. Focus on research methods: Whatever happened to qualitative description? *Res Nurs Health* 2000; 23, 334-340.
20. Elo S, Kyngas H. The qualitative content analysis process. *J Adv Nurs* 2007; 6, 107–115.
21. Tong A, Sainsbury P, Craig J. Consolidated criteria for reporting qualitative research (COREQ): a 32-item checklist for interviews and focus groups. *Int J Qual Health Care* 2007;19(6):349-357.
22. Von Ah D. Cognitive changes associated with cancer and cancer treatment: State of the science. *Clin J Oncol Nurs* 2015; 19, 47–56. doi:10.1188/15.CJON.19-01AP.
23. Cheung YT, Shwe M, Tan YP, Fan G, Ng R, Chan A. Cognitive changes in multiethnic Asian breast cancer patients: a focus group study. *Ann Oncol* 2012; 23(10):2547–2552. doi: 10.1093/annonc/mds029.
24. Hart RP, Wade JB, Martelli MF. Cognitive impairment in patients with chronic pain: The significance of stress. *Curr Pain Headache Rep* 2003; 7(2), 116–126.
25. Myers JS. Cancer- and chemotherapy-related cognitive changes: the patient experience. *Semin Oncol Nurs* 2013;29(4):300-7. doi: 10.1016/j.soncn.2013.08.010.

- 1  
2  
3  
4  
5  
6  
7  
8  
9  
10  
11  
12  
13  
14  
15  
16  
17  
18  
19  
20  
21  
22  
23  
24  
25  
26  
27  
28  
29  
30  
31  
32  
33  
34  
35  
36  
37  
38  
39  
40  
41  
42  
43  
44  
45  
46  
47  
48  
49  
50  
51  
52  
53  
54  
55  
56  
57  
58  
59  
60
26. Zeng YC. E-mail interviewing Chinese hospital nurses' interpretations of work-related stress. *Asian J Nurs* 2008; 11 (2): 72-79.
27. Munir F, Kalawsky K, Lawrence C, Yarker J, Haslam C, Ahmed S. Cognitive intervention for breast cancer patients undergoing adjuvant chemotherapy: a needs analysis. *Cancer Nurs* 2011; 34(5):385–392. doi:10.1097/NCC.0b013e31820254f3.
28. Becker H, Henneghan A, Mikan SQ. When do I get my brain back? Breast cancer survivors' experiences of cognitive problems. *Clin J Oncol Nurs* 2015; 19(2):180-4. doi: 10.1188/15.CJON.180-184.
29. Duijts SF, van Egmond MP, Spelten E, van Muijen P, Anema JR, van der Beek AJ. Physical and psychosocial problems in cancer survivors beyond return to work: A systematic review. *Psychooncology* 2014; 23: 481–492. doi: 10.1002/pon.3467.
30. Zeng YC, Cheng ASK, Chan CCH. Meta-analysis of the effects of neuropsychological interventions on cognitive function in non-central nervous system cancer survivors. *Integr Cancer Ther* 2016; 1-11. doi: 10.1177/1534735416638737.
31. Treanor CJ, McMenamin UC, O'Neill RF, Cardwell CR, Clarke MJ, Cantwell M, Donnelly M. Non-pharmacological interventions for cognitive impairment due to systemic cancer treatment. *Cochrane Database of Systematic Reviews* 2016, Issue 8. Art. No.: CD011325. DOI: 10.1002/14651858.CD011325.pub2.

**Table 1** Demographic and clinical characteristics of participants with cognitive impairment and without cognitive impairment

| Variables                                                          | Mean (SD) / (%)                           |                                              |
|--------------------------------------------------------------------|-------------------------------------------|----------------------------------------------|
|                                                                    | With reported cognitive impairment (n=20) | Without reported cognitive impairment (n=11) |
| <b>Age (years) (range)</b>                                         | 46.40 (9.80) (19-57)                      | 43.45 (12.08) (19-56)                        |
| <b>Education levels</b>                                            |                                           |                                              |
| Primary school or below                                            | 11 (55.0)                                 | 5 (45.5)                                     |
| College                                                            | 6 (30.0)                                  | 5 (45.5)                                     |
| University or above                                                | 3 (15.0)                                  | 1 (9.0)                                      |
| <b>Employment status</b>                                           |                                           |                                              |
| Employed but on medical leave                                      | 10 (50.0)                                 | 7 (63.6)                                     |
| Unemployed or retired                                              | 10 (50.0)                                 | 4 (36.4)                                     |
| <b>Marital status</b>                                              |                                           |                                              |
| Married                                                            | 19 (95.0)                                 | 10 (90.9)                                    |
| Divorced                                                           | 1 (5.0)                                   | 1 (9.1)                                      |
| <b>Disease stage</b>                                               |                                           |                                              |
| Stage IA                                                           | 7 (35.0)                                  | 4 (36.4)                                     |
| Stage IB-IIA                                                       | 11 (55.0)                                 | 6 (54.5)                                     |
| Stage IIB-IVA                                                      | 2 (10.0)                                  | 1 (9.1)                                      |
| <b>Types of treatment</b>                                          |                                           |                                              |
| Surgery                                                            | 5 (25.0)                                  | 3 (27.3)                                     |
| Surgery + chemotherapy                                             | 5 (25.0)                                  | 4 (36.4)                                     |
| Surgery + radiation therapy                                        | 2 (10.0)                                  | 0 (0.0)                                      |
| Surgery+radiation+chemotherapy                                     | 6 (30.0)                                  | 2 (18.2)                                     |
| Radiation or chemotherapy                                          | 2 (10.0)                                  | 2 (18.2)                                     |
| <b>Time since completion of primary treatment (months) (range)</b> | 1.70 (1.03) (1-5)                         | 1.63 (1.20) (1-5)                            |

**Table 2** Major categories from the qualitative content analysis (N=20)

| Categories                                                            | n (%)     | Illustrative quotes from participants                                                                                                                                                                                                  |
|-----------------------------------------------------------------------|-----------|----------------------------------------------------------------------------------------------------------------------------------------------------------------------------------------------------------------------------------------|
| <b>Cognitive complaints</b>                                           |           |                                                                                                                                                                                                                                        |
| Lost concentration                                                    | 17(85.0)  | <i>It's difficult to focus on a conversation or when reading newspapers or books. My biggest problem is lack of concentration</i>                                                                                                      |
| Easily forgetting things or information from others                   | 15 (75.0) | <i>My memory changed a lot after chemotherapy; when I meet my friend on the street, I can't even remember her name. Sometimes, nurses tell me information about the illness, and I can't even remember what they have just told me</i> |
| Feeling it's hard to understand new things                            | 7 (35.0)  | <i>When I was reading books, I saw the words, but I could not make sense of the words, even when I read the same sentence several times.</i>                                                                                           |
| Difficulties in finding right word in general conversation            | 4 (20.0)  | <i>When I speak with someone in general conversation, it's hard for me to find the right words</i>                                                                                                                                     |
| Slowing down in working efficiency, compared with how they used to be | 2 (10.0)  | <i>I was used to being well organised in my work and daily life, but now it's hard to get back all those abilities, and work has slowed down a lot</i>                                                                                 |
| <b>Perceived causing factors</b>                                      |           |                                                                                                                                                                                                                                        |
| Relating to chemotherapy                                              | 15 (75.0) | <i>Even during chemotherapy, I found that my memory changed a lot. Now I have completed the whole cycle of chemotherapy, and more and more memory impairment has appeared</i>                                                          |
| Side effects of cancer and its treatment                              | 12 (60.0) | <i>I believe that a lot of physical examinations, such as CT at the time of diagnosis, the use of analgesics, and the surgery procedure are all related to my cognitive problems</i>                                                   |
| Aging                                                                 | 8 (40.0)  | <i>Maybe due to my age, my memory is worse and I've started forgetting things quickly</i>                                                                                                                                              |
| Psychosocial issues                                                   | 3 (15.0)  | <i>Having to deal with too many sources of stress, such as the financial issues related to medical treatment</i>                                                                                                                       |
| Relating to immune function                                           | 2 (10.0)  | <i>After I got this disease and received this series of cancer treatments, my immune</i>                                                                                                                                               |

*function was destroyed, so my memory problems are partly due to this*

### **Coping strategies**

|                                                                               |           |                                                                                                                                                                                                                                                     |
|-------------------------------------------------------------------------------|-----------|-----------------------------------------------------------------------------------------------------------------------------------------------------------------------------------------------------------------------------------------------------|
| By writing memos                                                              | 15 (75.0) | <i>Writing down important things, use of diaries or phone reminders to organise daily tasks</i>                                                                                                                                                     |
| Self-adjustment and relaxation techniques                                     | 14 (70.0) | <i>Asking myself to focus on one task at a time. When disturbed by other things or people, I'll adjust myself and refocus on what I was doing. By reading, or listening to music for focus</i>                                                      |
| Doing nothing                                                                 | 6 (30.0)  | <i>Now I can do nothing for this problem (cognitive impairment), as this may be due to my age; with older age, cognitive decline appears naturally. Other patients believe these cognitive problems are reversible and may get better gradually</i> |
| Environment organisation                                                      | 2 (10.0)  | <i>To keep important personal belongs such as keys, eyeglasses, mobile phone in a fixed place</i>                                                                                                                                                   |
| TCM such as acupuncture                                                       | 1 (5.0)   | <i>Doctors told me there were no effective drug therapies for this problem, so I tried acupuncture</i>                                                                                                                                              |
| <b>Supportive care needs from healthcare providers</b>                        |           |                                                                                                                                                                                                                                                     |
| Providing common symptoms of cognitive impairment and its effective therapies | 11 (55.0) | <i>It's great for doctors and nurses to tell me about common signs or symptoms of cognitive impairment, and to provide intervention therapies to treat these problems</i>                                                                           |
| Providing counselling services to family members                              | 8 (40.0)  | <i>It's hard for me to remember so much information. Healthcare providers should provide educational information and more counselling services to my family members</i>                                                                             |
| Need information about possible rehabilitation service                        | 7 (35.0)  | <i>After hospital discharge, where should I seek further rehabilitation service for cognitive problems? Or can I gradually recover from these problems?</i>                                                                                         |
| Offering peer support networks                                                | 2 (10.0)  | <i>At the time of diagnosis and during cancer treatment, I felt so worried. I need to connect with women who have had a similar experience, in order to share coping</i>                                                                            |



strategies

**Impacts on**

|                            |          |                                                                                                                                                                                                                                                                                                                                       |
|----------------------------|----------|---------------------------------------------------------------------------------------------------------------------------------------------------------------------------------------------------------------------------------------------------------------------------------------------------------------------------------------|
| Daily life                 | 20 (100) | <i>Sometimes, when people speak with me, I immediately forget what they were talking about, or when I'm doing things and people interrupt me, I'll forget what I wanted to do</i>                                                                                                                                                     |
| Quality of life            | 9 (45.0) | <i>This disease and its treatment have severely impacted all aspects of my life, and have left me feeling overwhelmed. Now I have a poor memory, slowed thinking process, and a large financial burden as a result of the medical costs, causing tension in my family relationship</i>                                                |
| Psychological health       | 5 (25.0) | <i>Sometimes my brain becomes a blank, and it seems my memory is not coming back, so I feel really scared</i>                                                                                                                                                                                                                         |
| Work capability            | 3 (15.0) | <i>I have to leave my job, due to my body image now, during and after chemotherapy I lost a lot of hair, and I can't work for very long, I can only work for a short period of time, then I have to rest</i>                                                                                                                          |
| Physical health conditions | 2 (10.0) | <i>Cognitive function changes were not obvious, but my health condition was a lot worse; before the cancer diagnosis, my health was OK. But now my sleep is not good, my immune system is much weaker, and due to the loss of physical energy I can't work too long and need to take a break after working for just a short while</i> |

---

Abbreviation: TCM, traditional Chinese medicine

1  
2  
3  
4  
5  
6  
7  
8  
9  
10  
11  
12  
13  
14  
15  
16  
17  
18  
19  
20  
21  
22  
23  
24  
25  
26  
27  
28  
29  
30  
31  
32  
33  
34  
35  
36  
37  
38  
39  
40  
41  
42  
43  
44  
45  
46  
47  
48  
49  
50  
51  
52  
53  
54  
55  
56  
57  
58  
59  
60

**Fig. 1** A preliminary cognition model among cervical cancer survivors after cancer treatment

For peer review only

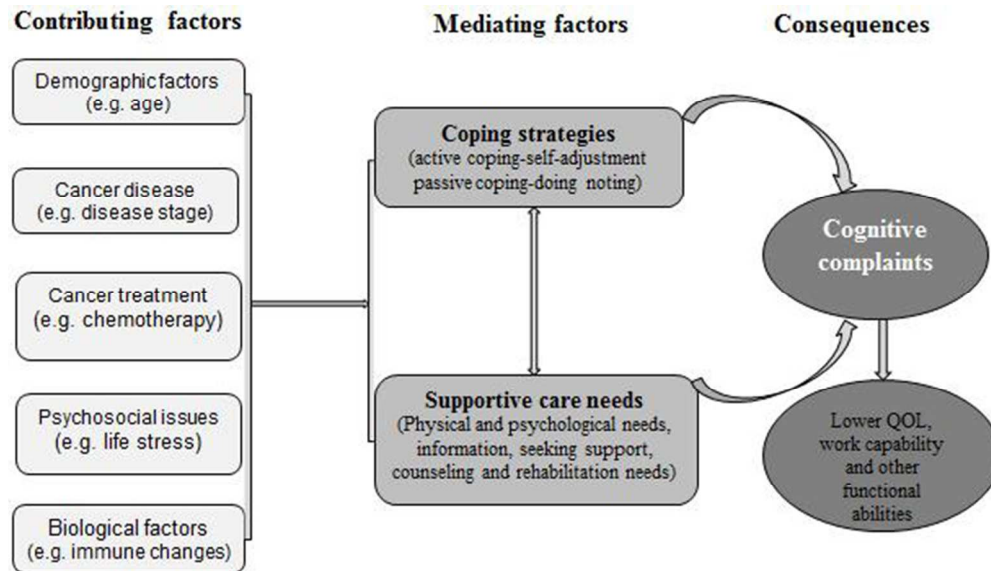

Fig. 1 A preliminary cognition model among cervical cancer survivors after cancer treatment  
Figure 1

review only

## Appendix 1 Consolidated criteria for reporting qualitative studies (COREQ) checklist

| COREQ items                                 | Descriptions                                                                                                                                      |
|---------------------------------------------|---------------------------------------------------------------------------------------------------------------------------------------------------|
| Domain 1: Research team and reflexivity     |                                                                                                                                                   |
| 1. Interviewer/facilitator                  | The third author conducted the interview (page 7, line 118)                                                                                       |
| 2. Credentials                              | The researcher is nursing professor and holds Master degree of Nursing (page 7, line 118-122)                                                     |
| 3. Occupation                               | Clinical nursing researcher at the time of the study (page 7, line 119-120)                                                                       |
| 4. Gender                                   | Female (page 7, line 121)                                                                                                                         |
| 5. Experience and training                  | All researchers work for clinical research for more than 5 years with qualitative research training (page 7, line 119-120)                        |
| Relationship with participants              |                                                                                                                                                   |
| 6. Relationship established                 | Working relationship was established prior to study commencement                                                                                  |
| 7. Participant knowledge of the interviewer | Participants know about the researcher for doing the research                                                                                     |
| 8. Interviewer characteristics              | Described at page 7 in the manuscript (line 118-121)                                                                                              |
| Domain 2: study design                      |                                                                                                                                                   |
| Theoretical framework                       |                                                                                                                                                   |
| 9. Methodological orientation and Theory    | Methodological orientation underpinning the study was content analysis and was guided by a conceptual model by Myers (2009) (page 6, line 96-103) |
| Participant selection                       |                                                                                                                                                   |
| 10. Sampling                                | Purposive sampling described at page 6, line 96-103                                                                                               |
| 11. Method of approach                      | Participants approached by face-to-face                                                                                                           |
| 12. Sample size                             | 31 participants in this study (page 8, line 161)                                                                                                  |
| 13. Non-participation                       | 19 participants refused, reasons described at page 8 (line 162) to page 9 (line 163)                                                              |
| Setting                                     |                                                                                                                                                   |
| 14. Setting of data collection              | Hospital's meeting room (page 7, line 124)                                                                                                        |
| 15. Presence of non-participants            | Nobody else present besides the participants and researchers (page 7, line 124)                                                                   |
| 16. Description of sample                   | Table 1.                                                                                                                                          |
| Data collection                             |                                                                                                                                                   |
| 17. Interview guide                         | Consisting of 7 open-ended questions and was pilot tested in one participant (page 7, line 127-136)                                               |
| 18. Repeat interviews                       | None                                                                                                                                              |
| 19. Audio/visual recording                  | N/A. as this study collected data by written narratives                                                                                           |
| 20. Field notes                             | Yes, at page 7, line 124                                                                                                                          |

1  
2  
3  
4  
5  
6  
7  
8  
9  
10  
11  
12  
13  
14  
15  
16  
17  
18  
19  
20  
21  
22  
23  
24  
25  
26  
27  
28  
29  
30  
31  
32  
33  
34  
35  
36  
37  
38  
39  
40  
41  
42  
43  
44  
45  
46  
47  
48  
49  
50  
51  
52  
53  
54  
55  
56  
57  
58  
59  
60

|                                    |                                                                                      |
|------------------------------------|--------------------------------------------------------------------------------------|
| 21. Duration                       | 30-45 minutes (page 7, line 136)                                                     |
| 22. Data saturation                | Yes, described at page 7, line 137-139                                               |
| 23. Transcripts returned           | Thirty-one copies of transcripts returned (page 8, line 161)                         |
| Domain 3: analysis and findings    |                                                                                      |
| Data analysis                      |                                                                                      |
| 24. Number of data coders          | Two research members coded the data (page 8, line 152)                               |
| 25. Description of the coding tree | None                                                                                 |
| 26. Derivation of themes           | Themes were derived from the data (Table2)                                           |
| 27. Software                       | Nvivo 11 was used to manage the data (page 8, line 144-146)                          |
| 28. Participant checking           | Three participants checked the final transcript of this study (page 8, line 155-157) |
| Reporting                          |                                                                                      |
| 29. Quotations presented           | Table 2                                                                              |
| 30. Data and findings consistent   | There was consistency between the data presented and the findings                    |
| 31. Clarity of major themes        | Major themes clearly presented in the findings (Table 2)                             |
| 32. Clarity of minor themes        | Any diverse case was resolved during the stage of data analysis                      |

---
