# Supplementary material for: Cervical cancer survivors’ perceived cognitive complaints and supportive care needs in mainland China: a qualitative study
Source: PubMed Central journal article supplement — BMJ Open. 2017 Jun 22;7(6):e014078. doi: 10.1136/bmjopen-2016-014078 (PMC5577865; doi:10.1136/bmjopen-2016-014078), 2017-06-22
Supplement: bmjopen-2016-014078supp001.pdf [file bmjopen-2016-014078supp001.pdf]

## Appendix 1 Consolidated criteria for reporting qualitative studies (COREQ) checklist

| COREQ items                                 | Descriptions                                                                                                                                      |
|---------------------------------------------|---------------------------------------------------------------------------------------------------------------------------------------------------|
| Domain 1: Research team and reflexivity     |                                                                                                                                                   |
| 1. Interviewer/facilitator                  | The third author conducted the interview (page 7, line 118)                                                                                       |
| 2. Credentials                              | The researcher is nursing professor and holds Master degree of Nursing (page 7, line 118-122)                                                     |
| 3. Occupation                               | Clinical nursing researcher at the time of the study (page 7, line 119-120)                                                                       |
| 4. Gender                                   | Female (page 7, line 121)                                                                                                                         |
| 5. Experience and training                  | All researchers work for clinical research for more than 5 years with qualitative research training (page 7, line 119-120)                        |
| Relationship with participants              |                                                                                                                                                   |
| 6. Relationship established                 | Working relationship was established prior to study commencement                                                                                  |
| 7. Participant knowledge of the interviewer | Participants know about the researcher for doing the research                                                                                     |
| 8. Interviewer characteristics              | Described at page 7 in the manuscript (line 118-121)                                                                                              |
| Domain 2: study design                      |                                                                                                                                                   |
| Theoretical framework                       |                                                                                                                                                   |
| 9. Methodological orientation and Theory    | Methodological orientation underpinning the study was content analysis and was guided by a conceptual model by Myers (2009) (page 6, line 96-103) |
| Participant selection                       |                                                                                                                                                   |
| 10. Sampling                                | Purposive sampling described at page 6, line 96-103                                                                                               |
| 11. Method of approach                      | Participants approached by face-to-face                                                                                                           |
| 12. Sample size                             | 31 participants in this study (page 8, line 161)                                                                                                  |
| 13. Non-participation                       | 19 participants refused, reasons described at page 8 (line 162) to page 9 (line 163)                                                              |
| Setting                                     |                                                                                                                                                   |
| 14. Setting of data collection              | Hospital's meeting room (page 7, line 124)                                                                                                        |
| 15. Presence of non-participants            | Nobody else present besides the participants and researchers (page 7, line 124)                                                                   |
| 16. Description of sample                   | Table 1.                                                                                                                                          |
| Data collection                             |                                                                                                                                                   |
| 17. Interview guide                         | Consisting of 7 open-ended questions and was pilot tested in one participant (page 7, line 127-136)                                               |
| 18. Repeat interviews                       | None                                                                                                                                              |
| 19. Audio/visual recording                  | N/A. as this study collected data by written narratives                                                                                           |
| 20. Field notes                             | Yes, at page 7, line 124                                                                                                                          |

|                                    |                                                                                      |
|------------------------------------|--------------------------------------------------------------------------------------|
| 21. Duration                       | 30-45 minutes (page 7, line 136)                                                     |
| 22. Data saturation                | Yes, described at page 7, line 137-139                                               |
| 23. Transcripts returned           | Thirty-one copies of transcripts returned (page 8, line 161)                         |
| Domain 3: analysis and findings    |                                                                                      |
| Data analysis                      |                                                                                      |
| 24. Number of data coders          | Two research members coded the data (page 8, line 152)                               |
| 25. Description of the coding tree | None                                                                                 |
| 26. Derivation of themes           | Themes were derived from the data (Table 2)                                          |
| 27. Software                       | Nvivo 11 was used to manage the data (page 8, line 144-146)                          |
| 28. Participant checking           | Three participants checked the final transcript of this study (page 8, line 155-157) |
| Reporting                          |                                                                                      |
| 29. Quotations presented           | Table 2                                                                              |
| 30. Data and findings consistent   | There was consistency between the data presented and the findings                    |
| 31. Clarity of major themes        | Major themes clearly presented in the findings (Table 2)                             |
| 32. Clarity of minor themes        | Any diverse case was resolved during the stage of data analysis                      |

---
